# Supplementary material for: Genomic and Transcriptomic Insight of Giant Sclerotium Formation of Wood-Decay Fungi
Source: Front Microbiol. 2021 Oct 12;12:746121. doi: 10.3389/fmicb.2021.746121 (PMC8546338; doi:10.3389/fmicb.2021.746121)
Supplement: Supplementary file 2 [file Table_2.XLSX]

## Sheet: Sheet1
Supplementary Data 2. Genes involved in W.cocos genome-wide doubling events
ID		Nr Subject_annotation
## Alignment 0: score=545.0 e_value=9.3e-27 N=11 Chr1&Chr1 minus
WC05142.t1	WC11091.t1	dihydrodipicolinate synthetase [Polyporus brumalis]
WC05139.t1	WC11090.t1	Formate/nitrite transporter [Gloeophyllum trabeum ATCC 11539] &gt;lcl|EPQ57626.1 Formate/nitrite transporter [Gloeophyllum trabeum ATCC 11539]
WC05138.t1	WC11089.t1	G-alpha-domain-containing protein [Lentinus tigrinus ALCF2SS1-7]
WC05137.t1	WC11088.t1	hypothetical protein WOLCODRAFT_166126 [Wolfiporia cocos MD-104 SS10]
WC10758.t1	WC11087.t1	hypothetical protein OH76DRAFT_1403040 [Polyporus brumalis]
WC10756.t1	WC11085.t1	hypothetical protein PYCCODRAFT_1478576 [Trametes coccinea BRFM310]
WC10755.t1	WC11084.t1	hypothetical protein POSPLADRAFT_1133204 [Postia placenta MAD-698-R-SB12] &gt;lcl|OSX66757.1 hypothetical protein POSPLADRAFT_1133204 [Postia placenta MAD-698-R-SB12]
WC10753.t1	WC11082.t1	hypothetical protein OBBRIDRAFT_891624 [Obba rivulosa]
WC10752.t1	WC11081.t2	cdc1p [Moniliophthora roreri MCA 2997]
WC10751.t1	WC11080.t1	hypothetical protein POSPLADRAFT_1138073 [Postia placenta MAD-698-R-SB12] &gt;lcl|EED78969.1 predicted protein [Postia placenta Mad-698-R] &gt;lcl|OSX64056.1 hypothetical protein POSPLADRAFT_1138073 [Postia placenta MAD-698-R-SB12]
WC10750.t1	WC11079.t1	hypothetical protein WOLCODRAFT_163888 [Wolfiporia cocos MD-104 SS10]
## Alignment 1: score=257.0 e_value=3.6e-10 N=6 Chr1&Chr1 minus
WC06108.t1	WC06166.t1	hypothetical protein PHLCEN_2v8647 [Phlebia centrifuga]
WC06117.t1	WC06158.t1	cytochrome P450 [Wolfiporia cocos MD-104 SS10]
WC06118.t1	WC06155.t1	cytochrome P450 monooxygenase pc-bph [Wolfiporia cocos MD-104 SS10]
WC06119.t1	WC06147.t1	hypothetical protein WOLCODRAFT_144864, partial [Wolfiporia cocos MD-104 SS10]
WC06120.t1	WC06138.t1	hypothetical protein FOMPIDRAFT_1091077, partial [Fomitopsis pinicola FP-58527 SS1]
WC06121.t1	WC06122.t1	hypothetical protein WOLCODRAFT_154242 [Wolfiporia cocos MD-104 SS10]
## Alignment 2: score=299.0 e_value=8e-08 N=6 Chr1&Chr2 plus
WC01401.t1	WC11037.t1	hypothetical protein OH76DRAFT_582181 [Polyporus brumalis]
WC01400.t1	WC11035.t1	predicted protein [Postia placenta Mad-698-R]
WC01399.t1	WC11034.t1	alpha/beta-hydrolase [Obba rivulosa]
WC01398.t1	WC11033.t1	hypothetical protein BN946_scf184967.g11 [Trametes cinnabarina]
WC01397.t1	WC11032.t1	dienelactone hydrolase [Wolfiporia cocos MD-104 SS10]
WC01396.t1	WC11031.t1	kinase-like protein [Wolfiporia cocos MD-104 SS10]
## Alignment 3: score=299.0 e_value=7.9e-08 N=6 Chr1&Chr2 plus
WC01401.t1	WC09800.t1	hypothetical protein OH76DRAFT_582181 [Polyporus brumalis]
WC01400.t1	WC09798.t1	predicted protein [Postia placenta Mad-698-R]
WC01399.t1	WC09797.t1	alpha/beta-hydrolase [Obba rivulosa]
WC01398.t1	WC09796.t1	hypothetical protein BN946_scf184967.g11 [Trametes cinnabarina]
WC01397.t1	WC09795.t1	dienelactone hydrolase [Wolfiporia cocos MD-104 SS10]
WC01396.t1	WC09794.t1	kinase-like protein [Wolfiporia cocos MD-104 SS10]
## Alignment 4: score=387.0 e_value=4e-20 N=8 Chr1&Chr3 plus
WC00759.t1	WC10510.t1	hypothetical protein BN946_scf184938.g17 [Trametes cinnabarina]
WC00758.t1	WC10509.t1	hypothetical protein FOMPIDRAFT_1120717 [Fomitopsis pinicola FP-58527 SS1]
WC00757.t1	WC10508.t1	hypothetical protein A0H81_09155 [Grifola frondosa]
WC00756.t1	WC10507.t1	hypothetical protein POSPLADRAFT_1074264 [Postia placenta MAD-698-R-SB12] &gt;lcl|OSX62855.1 hypothetical protein POSPLADRAFT_1074264 [Postia placenta MAD-698-R-SB12]
WC00755.t1	WC10506.t1	hypothetical protein WOLCODRAFT_138756 [Wolfiporia cocos MD-104 SS10]
WC00754.t1	WC10505.t1	aryl-alcohol dehydrogenase [Wolfiporia cocos MD-104 SS10]
WC00753.t1	WC10504.t1	conidiation 6 [Pyrenophora seminiperda CCB06]
WC06045.t1	WC10490.t1	DUF1793-domain-containing protein [Wolfiporia cocos MD-104 SS10]
## Alignment 5: score=1135.0 e_value=2.1e-69 N=23 Chr1&Chr5 plus
WC10792.t1	WC07604.t1	NAD-P-binding protein [Obba rivulosa]
WC10791.t1	WC07601.t1	glycosyltransferase family 20 protein [Phanerochaete carnosa HHB-10118-sp] &gt;lcl|EKM58241.1 glycosyltransferase family 20 protein [Phanerochaete carnosa HHB-10118-sp]
WC10790.t1	WC07600.t1	glycosyltransferase family 20 protein [Phanerochaete carnosa HHB-10118-sp] &gt;lcl|EKM58241.1 glycosyltransferase family 20 protein [Phanerochaete carnosa HHB-10118-sp]
WC10788.t1	WC07598.t1	hypothetical protein M378DRAFT_159549 [Amanita muscaria Koide BX008]
WC10785.t1	WC07597.t1	NAD(P)-binding protein [Wolfiporia cocos MD-104 SS10]
WC10782.t1	WC07594.t1	predicted protein [Postia placenta Mad-698-R]
WC10780.t1	WC07593.t1	hypothetical protein POSPLADRAFT_1134138 [Postia placenta MAD-698-R-SB12] &gt;lcl|EED78480.1 predicted protein [Postia placenta Mad-698-R] &gt;lcl|OSX64668.1 hypothetical protein POSPLADRAFT_1134138 [Postia placenta MAD-698-R-SB12]
WC10778.t1	WC07592.t1	hypothetical protein HYPSUDRAFT_49070 [Hypholoma sublateritium FD-334 SS-4]
WC10777.t1	WC07591.t1	ZIP-like iron-zinc transporter [Gloeophyllum trabeum ATCC 11539] &gt;lcl|EPQ52622.1 ZIP-like iron-zinc transporter [Gloeophyllum trabeum ATCC 11539]
WC10776.t1	WC07590.t1	hypothetical protein FOMPIDRAFT_1025515 [Fomitopsis pinicola FP-58527 SS1]
WC10775.t1	WC07589.t1	hypothetical protein NEOLEDRAFT_1143796 [Neolentinus lepideus HHB14362 ss-1]
WC10774.t1	WC07588.t1	hypothetical protein SERLA73DRAFT_182243, partial [Serpula lacrymans var. lacrymans S7.3]
WC10773.t1	WC07587.t1	hypothetical protein OH76DRAFT_1544081 [Polyporus brumalis]
WC10772.t1	WC07586.t1	cyclophilin-like protein [Wolfiporia cocos MD-104 SS10]
WC10771.t1	WC07585.t1	G-protein alpha subunit [Wolfiporia cocos MD-104 SS10]
WC10770.t1	WC07584.t1	F-actin capping protein beta subunit [Wolfiporia cocos MD-104 SS10]
WC10769.t1	WC07582.t1	FAD-binding domain-containing protein [Wolfiporia cocos MD-104 SS10]
WC10767.t1	WC07580.t1	hypothetical protein CERSUDRAFT_49099 [Gelatoporia subvermispora B]
WC10764.t2	WC07578.t1	predicted protein [Postia placenta Mad-698-R]
WC10763.t1	WC07577.t1	predicted protein [Fibroporia radiculosa] &gt;lcl|CCM03107.1 predicted protein [Fibroporia radiculosa]
WC10761.t1	WC07575.t1	hypothetical protein WOLCODRAFT_163800 [Wolfiporia cocos MD-104 SS10]
WC10760.t1	WC07574.t1	ASTRA-associated protein 1 [Grifola frondosa]
WC10759.t1	WC07573.t1	hypothetical protein POSPLADRAFT_1141629 [Postia placenta MAD-698-R-SB12] &gt;lcl|OSX62540.1 hypothetical protein POSPLADRAFT_1141629 [Postia placenta MAD-698-R-SB12]
## Alignment 6: score=2436.0 e_value=3.9e-180 N=49 Chr1&Chr6 minus
WC01552.t1	WC04387.t1	hypothetical protein NEOLEDRAFT_1054196 [Neolentinus lepideus HHB14362 ss-1]
WC01551.t1	WC04386.t1	hypothetical protein LAESUDRAFT_680700, partial [Laetiporus sulphureus 93-53]
WC01549.t1	WC04385.t1	mitochondrial carrier [Wolfiporia cocos MD-104 SS10]
WC01548.t1	WC04384.t1	hypothetical protein GALMADRAFT_53006 [Galerina marginata CBS 339.88]
WC01547.t1	WC04383.t1	hypothetical protein CC1G_01739 [Coprinopsis cinerea okayama7#130] &gt;lcl|EAU92694.2 hypothetical protein CC1G_01739 [Coprinopsis cinerea okayama7#130]
WC01546.t1	WC04382.t1	hypothetical protein CC1G_01739 [Coprinopsis cinerea okayama7#130] &gt;lcl|EAU92694.2 hypothetical protein CC1G_01739 [Coprinopsis cinerea okayama7#130]
WC01545.t1	WC04381.t1	zf-C3HC4-domain-containing protein [Dichomitus squalens LYAD-421 SS1] &gt;lcl|EJF66799.1 zf-C3HC4-domain-containing protein [Dichomitus squalens LYAD-421 SS1]
WC01544.t1	WC04380.t1	hypothetical protein PHLCEN_2v537 [Phlebia centrifuga]
WC01543.t1	WC04379.t1	hypothetical protein CERSUDRAFT_110683 [Gelatoporia subvermispora B]
WC01542.t1	WC04378.t1	NADPH oxidase [Lentinus tigrinus ALCF2SS1-7]
WC01541.t1	WC04377.t1	hypothetical protein CERSUDRAFT_129545 [Gelatoporia subvermispora B]
WC01540.t1	WC04376.t1	ATP-dependent DNA helicase [Lentinus tigrinus ALCF2SS1-6] &gt;lcl|RPD82451.1 ATP-dependent DNA helicase [Lentinus tigrinus ALCF2SS1-7]
WC01539.t1	WC04372.t1	hypothetical protein WOLCODRAFT_147810 [Wolfiporia cocos MD-104 SS10]
WC01534.t1	WC04370.t1	ketoacyl-synt-domain-containing protein [Laetiporus sulphureus 93-53]
WC01533.t1	WC04368.t1	hypothetical protein POSPLADRAFT_1141400 [Postia placenta MAD-698-R-SB12] &gt;lcl|OSX62670.1 hypothetical protein POSPLADRAFT_1141400 [Postia placenta MAD-698-R-SB12]
WC01531.t1	WC04367.t1	zinc-binding oxidoreductase [Pyrrhoderma noxium]
WC01530.t1	WC04366.t1	cytochrome P450 [Gloeophyllum trabeum ATCC 11539] &gt;lcl|EPQ54140.1 cytochrome P450 [Gloeophyllum trabeum ATCC 11539]
WC01529.t1	WC04365.t1	hypothetical protein CVT25_010761 [Psilocybe cyanescens]
WC01528.t1	WC04364.t1	Transcription initiation factor TFIID subunit 5 [Grifola frondosa]
WC01527.t1	WC04363.t1	hypothetical protein LAESUDRAFT_654940 [Laetiporus sulphureus 93-53]
WC01526.t1	WC04362.t1	hypothetical protein DAEQUDRAFT_808793 [Daedalea quercina L-15889]
WC01525.t1	WC04361.t1	hypothetical protein PHLGIDRAFT_63764 [Phlebiopsis gigantea 11061_1 CR5-6]
WC01524.t1	WC04360.t1	hypothetical protein PHLCEN_2v550 [Phlebia centrifuga]
WC01523.t1	WC04359.t1	Uncharacterized protein YxjH [Grifola frondosa]
WC01522.t1	WC04358.t1	hypothetical protein TRAVEDRAFT_106684, partial [Trametes versicolor FP-101664 SS1] &gt;lcl|EIW64570.1 hypothetical protein TRAVEDRAFT_106684, partial [Trametes versicolor FP-101664 SS1]
WC01521.t1	WC04357.t1	glycoside hydrolase family 28 protein [Armillaria gallica]
WC01520.t1	WC04356.t1	imidazole glycerol phosphate synthase HisHF [Trametes coccinea BRFM310]
WC01519.t1	WC04355.t1	D-3-phosphoglycerate dehydrogenase 1 [Grifola frondosa]
WC01518.t1	WC04353.t1	hypothetical protein CVT26_001259 [Gymnopilus dilepis]
WC01517.t1	WC04352.t1	hypothetical protein PHLCEN_2v560 [Phlebia centrifuga]
WC01516.t1	WC04351.t1	40S ribosomal protein S16 [Wolfiporia cocos MD-104 SS10]
WC01515.t2	WC04350.t1	predicted protein [Fibroporia radiculosa] &gt;lcl|CCL99016.1 predicted protein [Fibroporia radiculosa]
WC01514.t1	WC04349.t1	hypothetical protein TRAPUB_4532 [Trametes pubescens]
WC01513.t1	WC04348.t1	hypothetical protein HYDPIDRAFT_106709 [Hydnomerulius pinastri MD-312]
WC01512.t1	WC04347.t1	hypothetical protein WOLCODRAFT_160280 [Wolfiporia cocos MD-104 SS10]
WC01511.t1	WC04345.t1	hypothetical protein WOLCODRAFT_160280 [Wolfiporia cocos MD-104 SS10]
WC01510.t1	WC04344.t1	nuclear movement protein nudC [Peniophora sp. CONT]
WC01509.t1	WC04343.t1	E3 SUMO-protein ligase pli1 [Grifola frondosa]
WC01508.t1	WC04342.t1	hypothetical protein PILCRDRAFT_817121 [Piloderma croceum F 1598]
WC01507.t1	WC04341.t1	indigoidine synthase A-like protein [Laetiporus sulphureus 93-53]
WC01506.t1	WC04340.t1	Molybdopterin synthase catalytic subunit [Sparassis crispa] &gt;lcl|GBE78002.1 Molybdopterin synthase catalytic subunit [Sparassis crispa]
WC01505.t1	WC04339.t1	hypothetical protein WOLCODRAFT_112317 [Wolfiporia cocos MD-104 SS10]
WC01504.t1	WC04338.t1	hypothetical protein PHLGIDRAFT_83358 [Phlebiopsis gigantea 11061_1 CR5-6]
WC01503.t1	WC04337.t1	phosphoacetylglucosamine mutase [Trametes coccinea BRFM310]
WC01502.t1	WC04336.t1	TPR-like protein [Polyporus brumalis]
WC01501.t1	WC04335.t1	hypothetical protein M378DRAFT_155821 [Amanita muscaria Koide BX008]
WC01500.t1	WC04334.t1	hypothetical protein PISMIDRAFT_588406 [Pisolithus microcarpus 441]
WC01499.t1	WC04333.t1	hypothetical protein NEOLEDRAFT_1053472 [Neolentinus lepideus HHB14362 ss-1]
WC01498.t1	WC04332.t1	flavo protein [Neolentinus lepideus HHB14362 ss-1]
## Alignment 7: score=348.0 e_value=3.6e-12 N=7 Chr1&Chr6 minus
WC00235.t1	WC04331.t1	SRF-TF-domain-containing protein [Neolentinus lepideus HHB14362 ss-1]
WC00236.t1	WC04330.t1	hypothetical protein PHLGIDRAFT_26369 [Phlebiopsis gigantea 11061_1 CR5-6]
WC00237.t1	WC04329.t1	hypothetical protein POSPLADRAFT_1067024 [Postia placenta MAD-698-R-SB12] &gt;lcl|EED81046.1 predicted protein [Postia placenta Mad-698-R] &gt;lcl|OSX60000.1 hypothetical protein POSPLADRAFT_1067024 [Postia placenta MAD-698-R-SB12]
WC00238.t1	WC04328.t1	NAD(P)-binding protein [Laetiporus sulphureus 93-53]
WC00239.t1	WC04326.t1	predicted protein [Fibroporia radiculosa] &gt;lcl|CCL99706.1 predicted protein [Fibroporia radiculosa]
WC00240.t1	WC04325.t1	hypothetical protein WOLCODRAFT_23337 [Wolfiporia cocos MD-104 SS10]
WC00242.t1	WC04324.t1	hypothetical protein ARMSODRAFT_720832 [Armillaria solidipes]
## Alignment 8: score=650.0 e_value=1.4e-29 N=13 Chr1&Chr7 plus
WC03410.t1	WC09619.t1	hypothetical protein K443DRAFT_487074 [Laccaria amethystina LaAM-08-1]
WC03411.t1	WC09618.t1	hypothetical protein PILCRDRAFT_811768 [Piloderma croceum F 1598]
WC03412.t1	WC09617.t1	hypothetical protein PHLGIDRAFT_117312 [Phlebiopsis gigantea 11061_1 CR5-6]
WC03413.t1	WC09616.t1	hypothetical protein WOLCODRAFT_99513 [Wolfiporia cocos MD-104 SS10]
WC03414.t1	WC09615.t1	hypothetical protein WOLCODRAFT_143278 [Wolfiporia cocos MD-104 SS10]
WC03415.t1	WC09614.t1	hypothetical protein A0H81_09740 [Grifola frondosa]
WC03416.t1	WC09613.t1	Orm1 type endoplasmic reticulum protein [Dichomitus squalens LYAD-421 SS1] &gt;lcl|EJF62280.1 Orm1 type endoplasmic reticulum protein [Dichomitus squalens LYAD-421 SS1]
WC03417.t1	WC09612.t1	hypothetical protein PHACADRAFT_250488 [Phanerochaete carnosa HHB-10118-sp] &gt;lcl|EKM59766.1 hypothetical protein PHACADRAFT_250488 [Phanerochaete carnosa HHB-10118-sp]
WC03418.t1	WC09611.t1	Glutamate carboxypeptidase 2 [Grifola frondosa]
WC03419.t1	WC09610.t1	hypothetical protein DAEQUDRAFT_108095 [Daedalea quercina L-15889]
WC03420.t1	WC09609.t1	hypothetical protein BN946_scf185015.g72 [Trametes cinnabarina]
WC03421.t1	WC09608.t1	hypothetical protein SERLADRAFT_360317 [Serpula lacrymans var. lacrymans S7.9] &gt;lcl|EGO02054.1 hypothetical protein SERLA73DRAFT_104326 [Serpula lacrymans var. lacrymans S7.3] &gt;lcl|EGO27675.1 hypothetical protein SERLADRAFT_360317 [Serpula lacrymans var. lacrymans S7.9]
WC03422.t1	WC09607.t1	hypothetical protein FOMPIDRAFT_1025558 [Fomitopsis pinicola FP-58527 SS1]
## Alignment 9: score=609.0 e_value=1.2e-51 N=13 Chr2&Chr2 plus
WC09804.t1	WC11041.t1	hypothetical protein Hypma_004840 [Hypsizygus marmoreus]
WC09803.t1	WC11040.t1	hypothetical protein OBBRIDRAFT_778099 [Obba rivulosa]
WC09802.t1	WC11039.t1	hypothetical protein PISMIDRAFT_678452 [Pisolithus microcarpus 441]
WC09801.t1	WC11038.t1	hypothetical protein LAESUDRAFT_739677 [Laetiporus sulphureus 93-53]
WC09800.t1	WC11037.t1	hypothetical protein BN946_scf184967.g14 [Trametes cinnabarina]
WC09799.t1	WC11036.t1	hypothetical protein WOLCODRAFT_147006 [Wolfiporia cocos MD-104 SS10]
WC09798.t1	WC11035.t1	hypothetical protein FOMPIDRAFT_1157338 [Fomitopsis pinicola FP-58527 SS1]
WC09797.t1	WC11034.t1	predicted protein [Fibroporia radiculosa] &gt;lcl|CCM01946.1 predicted protein [Fibroporia radiculosa]
WC09796.t1	WC11033.t1	hypothetical protein BN946_scf184967.g11 [Trametes cinnabarina]
WC09795.t1	WC11032.t1	predicted protein [Fibroporia radiculosa] &gt;lcl|CCM01948.1 predicted protein [Fibroporia radiculosa]
WC09794.t1	WC11031.t1	translation elongation factor 1a [Lentinus tigrinus ALCF2SS1-6] &gt;lcl|RPD82600.1 translation elongation factor 1a [Lentinus tigrinus ALCF2SS1-7]
WC10589.t1	WC10164.t1	23S rRNA (guanosine(2251)-2&apos;-O)-methyltransferase RlmB [Planktothrix sp. PCC 11201] &gt;lcl|SKB15371.1 putative enzyme [Planktothrix sp. PCC 11201]
WC10573.t1	WC10161.t1	hypothetical protein WOLCODRAFT_153150 [Wolfiporia cocos MD-104 SS10]
## Alignment 10: score=447.0 e_value=1.9e-21 N=9 Chr2&Chr2 minus
WC09846.t1	WC10601.t1	hypothetical protein OBBRIDRAFT_770017 [Obba rivulosa]
WC09845.t1	WC10602.t1	hypothetical protein HETIRDRAFT_314303 [Heterobasidion irregulare TC 32-1] &gt;lcl|ETW84086.1 hypothetical protein HETIRDRAFT_314303 [Heterobasidion irregulare TC 32-1]
WC09844.t1	WC10603.t1	Inosine/uridine-preferring nucleoside hydrolase [Calocera cornea HHB12733]
WC09843.t1	WC10604.t1	hypothetical protein OH76DRAFT_1384540 [Polyporus brumalis]
WC09842.t2	WC10605.t2	hypothetical protein LAESUDRAFT_693038 [Laetiporus sulphureus 93-53]
WC09841.t1	WC10606.t1	glycosyltransferase family 2 protein [Wolfiporia cocos MD-104 SS10]
WC09840.t1	WC10607.t1	glycosyltransferase family 2 protein [Wolfiporia cocos MD-104 SS10]
WC09839.t1	WC10608.t1	Transposon Ty3-I Gag-Pol polyprotein [Sparassis crispa] &gt;lcl|GBE85306.1 Transposon Ty3-I Gag-Pol polyprotein [Sparassis crispa]
WC09838.t1	WC10609.t1	hypothetical protein FOMMEDRAFT_148664, partial [Fomitiporia mediterranea MF3/22] &gt;lcl|EJC99404.1 hypothetical protein FOMMEDRAFT_148664, partial [Fomitiporia mediterranea MF3/22]
## Alignment 11: score=442.0 e_value=9.9e-19 N=9 Chr2&Chr2 minus
WC10403.t1	WC11050.t1	hypothetical protein WOLCODRAFT_151994 [Wolfiporia cocos MD-104 SS10]
WC10404.t1	WC11051.t1	hypothetical protein WOLCODRAFT_157317 [Wolfiporia cocos MD-104 SS10]
WC10405.t1	WC11052.t1	hypothetical protein WOLCODRAFT_20640 [Wolfiporia cocos MD-104 SS10]
WC10406.t1	WC11053.t1	NAD(P)-binding protein [Wolfiporia cocos MD-104 SS10]
WC10407.t1	WC11060.t1	hypothetical protein WOLCODRAFT_66201 [Wolfiporia cocos MD-104 SS10]
WC10408.t1	WC11062.t1	putative kinetochore protein NUF2, partial [Grifola frondosa]
WC10409.t1	WC11063.t1	ATP-dependent DNA helicase [Coniophora puteana RWD-64-598 SS2] &gt;lcl|EIW76690.1 ATP-dependent DNA helicase [Coniophora puteana RWD-64-598 SS2]
WC10410.t1	WC11064.t1	hypothetical protein POSPLADRAFT_1138902, partial [Postia placenta MAD-698-R-SB12] &gt;lcl|OSX63155.1 hypothetical protein POSPLADRAFT_1138902, partial [Postia placenta MAD-698-R-SB12]
WC10411.t1	WC11065.t1	hypothetical protein A0H81_06512 [Grifola frondosa]
## Alignment 12: score=888.0 e_value=3.3e-46 N=18 Chr2&Chr3 minus
WC08842.t1	WC08089.t1	hypothetical protein WOLCODRAFT_166990 [Wolfiporia cocos MD-104 SS10]
WC08841.t1	WC08091.t1	hypothetical protein POSPLADRAFT_1049731 [Postia placenta MAD-698-R-SB12] &gt;lcl|OSX57999.1 hypothetical protein POSPLADRAFT_1049731 [Postia placenta MAD-698-R-SB12]
WC08839.t1	WC08092.t1	PREDICTED: cholesterol 7-alpha-monooxygenase-like isoform X1 [Ictalurus punctatus]
WC08838.t1	WC08093.t1	hypothetical protein M413DRAFT_446477 [Hebeloma cylindrosporum h7]
WC08837.t1	WC08095.t1	hypothetical protein GSI_04142 [Ganoderma sinense ZZ0214-1]
WC08834.t1	WC08097.t1	2,3-dimethylmalate lyase [Grifola frondosa]
WC08832.t1	WC08099.t1	hypothetical protein OBBRIDRAFT_593562 [Obba rivulosa]
WC08830.t1	WC08102.t1	hypothetical protein FOMMEDRAFT_101459 [Fomitiporia mediterranea MF3/22] &gt;lcl|EJD08038.1 hypothetical protein FOMMEDRAFT_101459 [Fomitiporia mediterranea MF3/22]
WC08828.t1	WC08104.t1	hypothetical protein FOMPIDRAFT_1146471 [Fomitopsis pinicola FP-58527 SS1]
WC08827.t1	WC08105.t1	predicted protein [Sparassis crispa] &gt;lcl|GBE80763.1 predicted protein [Sparassis crispa]
WC08826.t1	WC08106.t1	predicted protein [Postia placenta Mad-698-R]
WC08825.t1	WC08107.t1	Eukaryotic translation initiation factor 4 gamma [Grifola frondosa]
WC08824.t1	WC08108.t1	P-loop containing nucleoside triphosphate hydrolase protein [Trametes coccinea BRFM310]
WC08822.t1	WC08109.t1	hypothetical protein TRAVEDRAFT_74474 [Trametes versicolor FP-101664 SS1] &gt;lcl|EIW54393.1 hypothetical protein TRAVEDRAFT_74474 [Trametes versicolor FP-101664 SS1]
WC08821.t1	WC08110.t1	hypothetical protein BN946_scf184847.g17 [Trametes cinnabarina]
WC08820.t1	WC08111.t1	hypothetical protein FOMPIDRAFT_1049715 [Fomitopsis pinicola FP-58527 SS1]
WC08818.t1	WC08113.t1	ribosomal protein S5 domain 2-like protein [Obba rivulosa]
WC08817.t1	WC08114.t1	DUF221-domain-containing protein [Trametes versicolor FP-101664 SS1] &gt;lcl|EIW54410.1 DUF221-domain-containing protein [Trametes versicolor FP-101664 SS1]
## Alignment 13: score=396.0 e_value=2.5e-15 N=8 Chr2&Chr4 minus
WC08812.t1	WC07450.t1	hypothetical protein PILCRDRAFT_827668 [Piloderma croceum F 1598]
WC08811.t1	WC07451.t1	Glycolipid 2-alpha-mannosyltransferase 2 [Sparassis crispa] &gt;lcl|GBE86019.1 Glycolipid 2-alpha-mannosyltransferase 2 [Sparassis crispa]
WC08809.t1	WC07454.t1	predicted protein [Fibroporia radiculosa] &gt;lcl|CCM07239.1 predicted protein [Fibroporia radiculosa]
WC08808.t1	WC07455.t1	predicted protein [Postia placenta Mad-698-R]
WC08807.t1	WC07456.t1	iron permease [Neolentinus lepideus HHB14362 ss-1]
WC08805.t1	WC07459.t1	hypothetical protein TRAPUB_14372 [Trametes pubescens]
WC08804.t1	WC07460.t1	hypothetical protein WOLCODRAFT_155565 [Wolfiporia cocos MD-104 SS10]
WC08803.t1	WC07461.t1	hypothetical protein A0H81_06717 [Grifola frondosa]
## Alignment 14: score=493.0 e_value=1.5e-19 N=10 Chr2&Chr6 minus
WC09162.t1	WC02510.t1	hypothetical protein PUNSTDRAFT_144171 [Punctularia strigosozonata HHB-11173 SS5] &gt;lcl|EIN07548.1 hypothetical protein PUNSTDRAFT_144171 [Punctularia strigosozonata HHB-11173 SS5]
WC09163.t1	WC02509.t1	hypothetical protein WOLCODRAFT_23480 [Wolfiporia cocos MD-104 SS10]
WC09165.t1	WC02507.t1	hypothetical protein M378DRAFT_8574 [Amanita muscaria Koide BX008]
WC09166.t1	WC02506.t1	hypothetical protein AN958_02469 [Leucoagaricus sp. SymC.cos]
WC09169.t1	WC02504.t1	hypothetical protein PYCCODRAFT_1376657 [Trametes coccinea BRFM310]
WC09172.t1	WC02502.t1	cytochrome P450 [Wolfiporia cocos MD-104 SS10]
WC09173.t2	WC02500.t2	cytochrome P450 [Wolfiporia cocos MD-104 SS10]
WC09174.t1	WC02499.t1	hypothetical protein SERLADRAFT_397220 [Serpula lacrymans var. lacrymans S7.9] &gt;lcl|EGN96273.1 hypothetical protein SERLA73DRAFT_141589 [Serpula lacrymans var. lacrymans S7.3] &gt;lcl|EGO21810.1 hypothetical protein SERLADRAFT_397220 [Serpula lacrymans var. lacrymans S7.9]
WC09175.t1	WC02498.t1	hypothetical protein A0H81_04857 [Grifola frondosa]
WC09176.t1	WC02497.t1	hypothetical protein ARMGADRAFT_1016684 [Armillaria gallica] &gt;lcl|SJL04677.1 related to spliceosome-associated protein SAP-49 [Armillaria ostoyae]
## Alignment 15: score=417.0 e_value=1.4e-24 N=9 Chr2&Chr6 minus
WC10582.t1	WC05122.t1	hypothetical protein HETIRDRAFT_305347 [Heterobasidion irregulare TC 32-1] &gt;lcl|ETW86578.1 hypothetical protein HETIRDRAFT_305347 [Heterobasidion irregulare TC 32-1]
WC10581.t1	WC05119.t1	predicted protein [Postia placenta Mad-698-R]
WC10580.t1	WC05113.t1	hypothetical protein WOLCODRAFT_137859 [Wolfiporia cocos MD-104 SS10]
WC10372.t1	WC05106.t1	hypothetical protein HETIRDRAFT_305347 [Heterobasidion irregulare TC 32-1] &gt;lcl|ETW86578.1 hypothetical protein HETIRDRAFT_305347 [Heterobasidion irregulare TC 32-1]
WC10373.t1	WC05105.t1	predicted protein [Postia placenta Mad-698-R]
WC10374.t1	WC05104.t1	hypothetical protein WOLCODRAFT_137859 [Wolfiporia cocos MD-104 SS10]
WC10375.t1	WC05103.t1	hypothetical protein CERSUDRAFT_20543, partial [Gelatoporia subvermispora B]
WC10376.t1	WC05102.t1	predicted protein [Fibroporia radiculosa] &gt;lcl|CCM02262.1 predicted protein [Fibroporia radiculosa]
WC10378.t1	WC05101.t1	candidate lipase from carbohydrate esterase family CE10, partial [Postia placenta Mad-698-R]
## Alignment 16: score=394.0 e_value=9e-18 N=8 Chr2&Chr7 plus
WC06774.t1	WC09396.t1	hypothetical protein LAESUDRAFT_660929 [Laetiporus sulphureus 93-53]
WC06772.t1	WC09394.t1	hypothetical protein WOLCODRAFT_157880, partial [Wolfiporia cocos MD-104 SS10]
WC06769.t1	WC09393.t1	Trans-aconitate 3-methyltransferase [Grifola frondosa]
WC06767.t1	WC09391.t1	Trans-aconitate 3-methyltransferase [Grifola frondosa]
WC06765.t1	WC09389.t1	hypothetical protein PYCCODRAFT_1425384 [Trametes coccinea BRFM310]
WC06764.t1	WC09388.t2	hypothetical protein LAESUDRAFT_751848 [Laetiporus sulphureus 93-53]
WC06763.t1	WC09387.t1	profilin-domain-containing protein [Daedalea quercina L-15889]
WC06762.t1	WC09386.t1	beach-domain-containing protein [Wolfiporia cocos MD-104 SS10]
## Alignment 17: score=297.0 e_value=2.1e-08 N=6 Chr2&Chr7 minus
WC06720.t1	WC09876.t1	hypothetical protein WOLCODRAFT_86323, partial [Wolfiporia cocos MD-104 SS10]
WC06718.t1	WC09875.t1	hypothetical protein SERLA73DRAFT_115870 [Serpula lacrymans var. lacrymans S7.3]
WC06717.t1	WC09874.t1	hypothetical protein HETIRDRAFT_436230 [Heterobasidion irregulare TC 32-1] &gt;lcl|ETW77306.1 hypothetical protein HETIRDRAFT_436230 [Heterobasidion irregulare TC 32-1]
WC06715.t1	WC09873.t1	hypothetical protein FOMPIDRAFT_1134324 [Fomitopsis pinicola FP-58527 SS1]
WC06714.t1	WC09871.t1	putative polyketide synthase [Obba rivulosa]
WC06713.t1	WC09870.t1	glyoxalase I [Fibularhizoctonia sp. CBS 109695]
## Alignment 18: score=297.0 e_value=2e-08 N=6 Chr2&Chr7 minus
WC06720.t1	WC09921.t1	hypothetical protein WOLCODRAFT_86323, partial [Wolfiporia cocos MD-104 SS10]
WC06718.t1	WC09920.t1	hypothetical protein SERLA73DRAFT_115870 [Serpula lacrymans var. lacrymans S7.3]
WC06717.t1	WC09919.t1	hypothetical protein HETIRDRAFT_436230 [Heterobasidion irregulare TC 32-1] &gt;lcl|ETW77306.1 hypothetical protein HETIRDRAFT_436230 [Heterobasidion irregulare TC 32-1]
WC06715.t1	WC09918.t1	hypothetical protein FOMPIDRAFT_1134324 [Fomitopsis pinicola FP-58527 SS1]
WC06714.t1	WC09916.t1	putative polyketide synthase [Obba rivulosa]
WC06713.t1	WC09915.t1	glyoxalase I [Fibularhizoctonia sp. CBS 109695]
## Alignment 19: score=567.0 e_value=1.3e-33 N=12 Chr3&Chr3 plus
WC09216.t1	WC06680.t1	H(+)/Cl(-) exchange transporter 5 [Trametes pubescens]
WC09209.t1	WC06666.t1	hypothetical protein FOMPIDRAFT_1048223 [Fomitopsis pinicola FP-58527 SS1]
WC09196.t1	WC06653.t1	hypothetical protein DICSQDRAFT_68877 [Dichomitus squalens LYAD-421 SS1] &gt;lcl|EJF57679.1 hypothetical protein DICSQDRAFT_68877 [Dichomitus squalens LYAD-421 SS1]
WC09195.t1	WC06651.t1	predicted protein [Fibroporia radiculosa] &gt;lcl|CCL99643.1 predicted protein [Fibroporia radiculosa]
WC09194.t1	WC06650.t1	hypothetical protein PHLCEN_2v9230 [Phlebia centrifuga]
WC09193.t1	WC06649.t1	predicted protein [Fibroporia radiculosa] &gt;lcl|CCL99644.1 predicted protein [Fibroporia radiculosa]
WC09191.t1	WC06648.t1	PLP-dependent transferase [Dichomitus squalens LYAD-421 SS1] &gt;lcl|EJF65434.1 PLP-dependent transferase [Dichomitus squalens LYAD-421 SS1]
WC09190.t1	WC06647.t1	hypothetical protein LAESUDRAFT_644190 [Laetiporus sulphureus 93-53]
WC09189.t1	WC06646.t2	hypothetical protein WOLCODRAFT_20301 [Wolfiporia cocos MD-104 SS10]
WC09188.t1	WC06645.t1	hypothetical protein PHACADRAFT_175217 [Phanerochaete carnosa HHB-10118-sp] &gt;lcl|EKM54706.1 hypothetical protein PHACADRAFT_175217 [Phanerochaete carnosa HHB-10118-sp]
WC09187.t1	WC06644.t1	hypothetical protein HETIRDRAFT_440521 [Heterobasidion irregulare TC 32-1] &gt;lcl|ETW80910.1 hypothetical protein HETIRDRAFT_440521 [Heterobasidion irregulare TC 32-1]
WC09181.t1	WC06643.t1	hypothetical protein FOMPIDRAFT_1113557 [Fomitopsis pinicola FP-58527 SS1]
## Alignment 20: score=320.0 e_value=6.2e-15 N=7 Chr3&Chr3 minus
WC09193.t1	WC06643.t1	predicted protein [Fibroporia radiculosa] &gt;lcl|CCL99644.1 predicted protein [Fibroporia radiculosa]
WC09181.t1	WC06649.t1	hypothetical protein FOMPIDRAFT_1113557 [Fomitopsis pinicola FP-58527 SS1]
WC06666.t1	WC06653.t1	hypothetical protein DICSQDRAFT_68877 [Dichomitus squalens LYAD-421 SS1] &gt;lcl|EJF57679.1 hypothetical protein DICSQDRAFT_68877 [Dichomitus squalens LYAD-421 SS1]
WC06664.t1	WC06655.t1	hypothetical protein PILCRDRAFT_819924 [Piloderma croceum F 1598]
WC06663.t1	WC06656.t1	predicted protein [Fibroporia radiculosa] &gt;lcl|CCL99643.1 predicted protein [Fibroporia radiculosa]
WC06662.t1	WC06657.t1	predicted protein [Fibroporia radiculosa] &gt;lcl|CCL99643.1 predicted protein [Fibroporia radiculosa]
WC06661.t1	WC06658.t1	Diphosphomevalonate decarboxylase [Wolfiporia cocos MD-104 SS10]
## Alignment 21: score=283.0 e_value=7.6e-11 N=6 Chr3&Chr3 minus
WC09623.t1	WC11150.t1	lipase [Taiwanofungus camphoratus]
WC11177.t1	WC11151.t1	hypothetical protein WOLCODRAFT_166155 [Wolfiporia cocos MD-104 SS10]
WC11176.t1	WC11152.t1	hypothetical protein LAESUDRAFT_754951 [Laetiporus sulphureus 93-53]
WC11175.t1	WC11153.t1	hypothetical protein A0H81_06650 [Grifola frondosa]
WC11163.t1	WC11154.t1	hypothetical protein LAESUDRAFT_651799 [Laetiporus sulphureus 93-53]
WC11162.t1	WC11155.t1	hypothetical protein LAESUDRAFT_651799 [Laetiporus sulphureus 93-53]
## Alignment 22: score=262.0 e_value=7e-10 N=6 Chr3&Chr3 minus
WC06402.t1	WC09780.t1	hypothetical protein CVT26_006070 [Gymnopilus dilepis]
WC06398.t1	WC09786.t1	hypothetical protein L226DRAFT_536410 [Lentinus tigrinus ALCF2SS1-7]
WC06396.t1	WC09787.t1	hypothetical protein WOLCODRAFT_155177 [Wolfiporia cocos MD-104 SS10]
WC10210.t1	WC10180.t1	protein prenylyltransferase [Polyporus brumalis]
WC10208.t1	WC10192.t1	Cytidine deaminase [Grifola frondosa]
WC10202.t1	WC10194.t1	F-box domain protein [Byssochlamys spectabilis No. 5]
## Alignment 23: score=291.0 e_value=1.6e-08 N=6 Chr3&Chr7 plus
WC06554.t1	WC09852.t1	hypothetical protein CY34DRAFT_80861 [Suillus luteus UH-Slu-Lm8-n1]
WC06553.t1	WC09853.t1	hypothetical protein BN946_scf184941.g30 [Trametes cinnabarina]
WC06552.t1	WC09854.t1	hypothetical protein PYCCODRAFT_1422348 [Trametes coccinea BRFM310]
WC06549.t1	WC09855.t1	hypothetical protein WOLCODRAFT_164384 [Wolfiporia cocos MD-104 SS10]
WC06545.t1	WC09859.t1	hypothetical protein SCHCODRAFT_257897 [Schizophyllum commune H4-8] &gt;lcl|EFI94323.1 hypothetical protein SCHCODRAFT_257897 [Schizophyllum commune H4-8]
WC06543.t1	WC09864.t1	hypothetical protein CERSUDRAFT_108038 [Gelatoporia subvermispora B]
## Alignment 24: score=893.0 e_value=1.1e-48 N=18 Chr5&Chr5 minus
WC07810.t1	WC07462.t1	hypothetical protein FOMPIDRAFT_1051293 [Fomitopsis pinicola FP-58527 SS1]
WC07807.t1	WC07464.t1	hypothetical protein LAESUDRAFT_725719 [Laetiporus sulphureus 93-53]
WC07806.t1	WC07465.t1	hypothetical protein PHLCEN_2v8440 [Phlebia centrifuga]
WC07802.t1	WC07468.t1	hypothetical protein PAXINDRAFT_175654 [Paxillus involutus ATCC 200175]
WC07801.t1	WC07469.t1	hypothetical protein PAXINDRAFT_175654 [Paxillus involutus ATCC 200175]
WC07800.t1	WC07470.t1	hypothetical protein GSI_09554 [Ganoderma sinense ZZ0214-1]
WC07799.t1	WC07471.t1	predicted protein [Fibroporia radiculosa] &gt;lcl|CCL99919.1 predicted protein [Fibroporia radiculosa]
WC07798.t1	WC07472.t1	hypothetical protein K443DRAFT_613684 [Laccaria amethystina LaAM-08-1]
WC07797.t1	WC07473.t1	hypothetical protein PHLGIDRAFT_35155 [Phlebiopsis gigantea 11061_1 CR5-6]
WC07796.t1	WC07474.t1	inorganic phosphate transporter [Lentinus tigrinus ALCF2SS1-6]
WC07795.t1	WC07475.t1	hypothetical protein GYMLUDRAFT_247981 [Gymnopus luxurians FD-317 M1]
WC07794.t1	WC07476.t1	hypothetical protein SCP_1104280 [Sparassis crispa] &gt;lcl|GBE87751.1 hypothetical protein SCP_1104280 [Sparassis crispa]
WC07793.t1	WC07477.t1	hypothetical protein CERSUDRAFT_142330 [Gelatoporia subvermispora B]
WC07792.t1	WC07478.t1	hypothetical protein DICSQDRAFT_175304 [Dichomitus squalens LYAD-421 SS1] &gt;lcl|EJF56002.1 hypothetical protein DICSQDRAFT_175304 [Dichomitus squalens LYAD-421 SS1]
WC07791.t1	WC07479.t1	hypothetical protein POSPLADRAFT_1141222 [Postia placenta MAD-698-R-SB12] &gt;lcl|OSX62969.1 hypothetical protein POSPLADRAFT_1141222 [Postia placenta MAD-698-R-SB12]
WC07790.t1	WC07480.t1	hypothetical protein WOLCODRAFT_163980 [Wolfiporia cocos MD-104 SS10]
WC07789.t1	WC07481.t1	hypothetical protein A0H81_07367 [Grifola frondosa]
WC07787.t1	WC07482.t1	hypothetical protein AMATHDRAFT_54465 [Amanita thiersii Skay4041]
## Alignment 25: score=932.0 e_value=1.8e-66 N=19 Chr7&Chr7 plus
WC09864.t1	WC09897.t1	hypothetical protein SCHCODRAFT_257897 [Schizophyllum commune H4-8] &gt;lcl|EFI94323.1 hypothetical protein SCHCODRAFT_257897 [Schizophyllum commune H4-8]
WC09867.t2	WC09910.t2	hypothetical protein FOMPIDRAFT_1018575 [Fomitopsis pinicola FP-58527 SS1]
WC09868.t1	WC09911.t1	hypothetical protein PHLGIDRAFT_271517 [Phlebiopsis gigantea 11061_1 CR5-6]
WC09869.t1	WC09913.t1	hypothetical protein PILCRDRAFT_10796 [Piloderma croceum F 1598]
WC09870.t1	WC09915.t1	glyoxalase I [Gloeophyllum trabeum ATCC 11539] &gt;lcl|EPQ57147.1 glyoxalase I [Gloeophyllum trabeum ATCC 11539]
WC09871.t1	WC09916.t1	hypothetical protein SERLA73DRAFT_163505 [Serpula lacrymans var. lacrymans S7.3]
WC09872.t1	WC09917.t1	hypothetical protein WOLCODRAFT_161855 [Wolfiporia cocos MD-104 SS10]
WC09873.t1	WC09918.t1	hypothetical protein SERLADRAFT_480485 [Serpula lacrymans var. lacrymans S7.9] &gt;lcl|EGN93445.1 hypothetical protein SERLA73DRAFT_189617 [Serpula lacrymans var. lacrymans S7.3] &gt;lcl|EGO18824.1 hypothetical protein SERLADRAFT_480485 [Serpula lacrymans var. lacrymans S7.9]
WC09874.t1	WC09919.t1	hypothetical protein HETIRDRAFT_436230 [Heterobasidion irregulare TC 32-1] &gt;lcl|ETW77306.1 hypothetical protein HETIRDRAFT_436230 [Heterobasidion irregulare TC 32-1]
WC09875.t1	WC09920.t1	hypothetical protein PLEOSDRAFT_1109929 [Pleurotus ostreatus PC15]
WC09876.t1	WC09921.t1	acetyl-CoA synthetase-like protein [Sparassis crispa] &gt;lcl|GBE79184.1 acetyl-CoA synthetase-like protein [Sparassis crispa]
WC09877.t1	WC09922.t1	acetyl-CoA synthetase-like protein [Sparassis crispa] &gt;lcl|GBE79184.1 acetyl-CoA synthetase-like protein [Sparassis crispa]
WC09878.t1	WC09923.t1	DASH complex, subunit Dad4 [Polyporus brumalis]
WC09879.t1	WC09924.t1	hypothetical protein WOLCODRAFT_140113, partial [Wolfiporia cocos MD-104 SS10]
WC09880.t1	WC09925.t1	hypothetical protein WOLCODRAFT_140115 [Wolfiporia cocos MD-104 SS10]
WC09881.t1	WC09926.t1	hypothetical protein TRAVEDRAFT_142622 [Trametes versicolor FP-101664 SS1] &gt;lcl|EIW63655.1 hypothetical protein TRAVEDRAFT_142622 [Trametes versicolor FP-101664 SS1]
WC09882.t1	WC09927.t1	hypothetical protein SCP_0302560 [Sparassis crispa] &gt;lcl|GBE80541.1 hypothetical protein SCP_0302560 [Sparassis crispa]
WC09883.t1	WC09928.t1	kinase-like protein [Lentinus tigrinus ALCF2SS1-6] &gt;lcl|RPD69613.1 kinase-like protein [Lentinus tigrinus ALCF2SS1-7]
WC09885.t1	WC09930.t1	hypothetical protein LAESUDRAFT_724020 [Laetiporus sulphureus 93-53]
