# Supplementary material for: Genomic and Transcriptomic Insight of Giant Sclerotium Formation of Wood-Decay Fungi
Source: Front Microbiol. 2021 Oct 12;12:746121. doi: 10.3389/fmicb.2021.746121 (PMC8546338; doi:10.3389/fmicb.2021.746121)
Supplement: Supplementary file 8 [file Table_8.XLSX]

## Sheet: Sheet1
Supplementary Data 8. Biosynthesis gene clusters located on 7 chromosomes
Chromosome	Secondary metabolism gene cluster	Gene ID
Chr1	T1PKS	WC00028	WC00029	WC00030	WC00031	WC00032	WC00033	WC00034	WC00035	WC00036
Chr1	T1PKS	WC00037	WC00038	WC00039	WC00040	WC00041
Chr1	TERPENE	WC00324	WC00325	WC00326	WC00327	WC00328	WC00329	WC00330	WC00331
Chr1	INDOLE	WC00655
Chr1	TERPENE	WC00672	WC00673	WC00674	WC00675	WC00676	WC00677
Chr1	TERPENE	WC00724
Chr1	T1PKS	WC01542	WC01541	WC01540	WC01539	WC01538	WC01537	WC01536	WC01535	WC01534	WC01533	WC01532	WC01531	WC01530
Chr2	TERPENE	WC08753	WC08752	WC08751	WC08750	WC08749	WC08748	WC08747	WC08746
Chr2	TERPENE	WC11246
Chr2	NRPS-LIKE	WC06720	WC06719
Chr2	T1PKS	WC06717	WC06716	WC06715	WC06714	WC06713
Chr3	NRPS-LIKE	WC09938
Chr3	TERPENE	WC08332	WC08331	WC08330
Chr3	T1PKS	WC06399
Chr3	TERPENE	WC09672	WC09671	WC09670	WC09669	WC09668
Chr4	T1PKS	WC07297	WC07296	WC07295
Chr4	TERPENE	W03679	WC03678	WC03677	WC03676	WC03675
Chr4	NRPS-LIKE	WC03602	WC03601	WC03600	WC03599	WC03598	WC03597	WC03596	WC03595	WC03594	WC03593	WC03592
Chr4	NRPS-LIKE	WC03494	WC03493	WC03492	WC03491	WC03490	WC03489	WC03488	WC03487	WC03486
Chr5	TERPENE	WC07569	WC07568	WC07567	WC07566	WC07565
Chr5	TERPENE	WC07564	WC07563	WC07562
Chr5	NRPS-like	WC07516	WC07515	WC07514	WC07513	WC07512	WC07511	WC07510	WC07509	WC07508	WC07507	WC07506	WC07505	WC07504	WC07503	WC07502	WC07501	WC07500	WC07499	WC07498	WC07497	WC07496	WC07495	WC07494	WC07493	WC07492	WC07491	WC07490	WC07489	WC07488	WC07487	WC07486	WC07485	WC07484	WC07483	WC07482	WC07481
Chr5	NRPS-like	WC05631	WC05632	WC05633	WC05634	WC05635	WC05636	WC05637	WC05638	WC05639	WC05640	WC05641	WC05642	WC05643	WC05644
Chr5	TERPENE	WC05646	WC05647	WC05648	WC05649	WC05650	WC05651	WC05652
Chr5	TERPENE	WC05666	WC05667	WC05668	WC05669	WC05670	WC05671	WC05672	WC05673	WC05674	WC05675
Chr5	T1PKS	WC05833	WC05834	WC05835	WC05836	WC05837	WC05838	WC05839	WC05840
Chr5	NRPS-LIKE	WC08387	WC08386	WC08385	WC08384	WC08383	WC08382	WC08381	WC08380	WC08379
Chr6	T1PKS	WC04366	WC04367	WC04368	WC04369	WC04370	WC04371	WC04372	WC04373	WC04374	WC04375	WC04376
Chr6	NRPS-LIKE	WC04591	WC04592	WC04593	WC04594	WC04595	WC04596	WC04597	WC04598	WC04599	WC04600	WC04601	WC04602
Chr6	TERPENE	WC04690	WC04691	WC04692	WC04693	WC04694	WC04695	WC04696	WC04697	WC04698	WC04699
Chr6	TERPENE	WC04898	WC04899	WC04900	WC04901	WC04902	WC04903	WC04904
Chr6	NRPS-LIKE	WC04979	WC04980	WC04981	WC04982	WC04983	WC04984	WC04985	WC04986	WC04987	WC04988	WC04989
Chr6	TERPENE	WC05048	WC05049	WC05050	WC05051	WC05052	WC05053	WC05054
Chr6	TERPENE	WC05056	WC05057	WC05058	WC05059	WC05060
Chr6	TERPENE	WC01616	WC01617	WC01618	WC01619	WC01620
Chr7	NRPS-like	WC09870	WC09871	WC09872	WC09873	WC09874	WC09875	WC09876	WC09877	WC09878	WC09879	WC09880	WC09881	WC09882	WC09883
Chr7	NRPS-like	WC09915	WC09916	WC09917	WC09918	WC09919	WC09920	WC09921	WC09922	WC09923	WC09924	WC09925	WC09926	WC09927	WC09928
Chr7	NRPS-like	WC04268	WC04267	WC04266	WC04265	WC04264	WC04263	WC04262	WC04261	WC04260	WC04259
Chr7	TERPENE	WC04237	WC04236	WC04235	WC04234	WC04233	WC04232
	core biosynthetic
	transport-related genes
	additional biosynthetics genes
	regulatory genes
	other genes
