# Supplementary material for: Genomic and Transcriptomic Insight of Giant Sclerotium Formation of Wood-Decay Fungi
Source: Front Microbiol. 2021 Oct 12;12:746121. doi: 10.3389/fmicb.2021.746121 (PMC8546338; doi:10.3389/fmicb.2021.746121)
Supplement: Supplementary file 10 [file Table_10.XLSX]

## Sheet: Sheet1
Supplementary Data 10. Expression of genes containing NAD and FAD related domains
Gene ID	MYC1	MYC2	MYC3	EP1	EP2	EP3	IP1	IP2	IP3	Sclerotium/Mycelium	description
WC09461	352	259	410	13490	36837	14940	3890	3991	4869	38.2062	NAD(P)-binding protein [Wolfiporia cocos MD-104 SS10]
WC08814	5	12	1	98	703	78	43	45	90	29.3611	hypothetical protein OBBRIDRAFT_86159 [Obba rivulosa]
WC01866	491	243	639	18251	21188	7203	2172	2362	2065	19.3886	Probable prephenate dehydrogenase [NADP(+)] [Sparassis crispa] &gt;lcl|GBE81844.1 Probable prephenate dehydrogenase [NADP(+)] [Sparassis crispa]
WC06904	545	331	564	24078	16300	6505	935	490	581	16.9753	hypothetical protein PILCRDRAFT_822610 [Piloderma croceum F 1598]
WC08085	2328	1435	3556	71806	114046	20134	652	517	381	14.1779	hypothetical protein POSPLADRAFT_1041467 [Postia placenta MAD-698-R-SB12] &gt;lcl|EED81474.1 predicted protein [Postia placenta Mad-698-R] &gt;lcl|OSX57913.1 hypothetical protein POSPLADRAFT_1041467 [Postia placenta MAD-698-R-SB12]
WC07597	5	0	0	5	21	26	15	35	38	14	NAD(P)-binding protein [Wolfiporia cocos MD-104 SS10]
WC07596	1	0	0	2	0	6	4	1	13	13	NAD(P)-binding protein [Wolfiporia cocos MD-104 SS10]
WC09651	36	16	52	190	429	362	561	409	641	12.4615	FAD/NAD(P)-binding domain-containing protein [Laetiporus sulphureus 93-53]
WC11764	10	2	17	30	16	15	317	124	175	11.6724	NAD(P)-binding protein [Wolfiporia cocos MD-104 SS10]
WC07582	1	1	0	35	6	2	0	0	3	11.5	FAD-binding domain-containing protein [Wolfiporia cocos MD-104 SS10]
WC00735	390	365	355	12321	3721	7201	303	234	222	10.8117	NAD(P)-binding protein [Wolfiporia cocos MD-104 SS10]
WC07579	2	7	8	35	60	41	98	34	72	10	FAD-binding domain-containing protein [Wolfiporia cocos MD-104 SS10]
WC06206	2	4	16	62	287	13	2	0	1	8.29545	NAD(P)-binding protein [Wolfiporia cocos MD-104 SS10]
WC10785	6	1	0	14	9	16	28	21	23	7.92857	NAD(P)-binding protein [Wolfiporia cocos MD-104 SS10]
WC10766	8	10	14	47	85	51	125	50	141	7.79688	FAD-binding domain-containing protein [Wolfiporia cocos MD-104 SS10]
WC11657	49	46	41	585	1089	274	3	7	16	7.25735	hypothetical protein WOLCODRAFT_167046 [Wolfiporia cocos MD-104 SS10]
WC10283	787	512	878	9765	9949	5814	1159	1413	1506	6.79972	FAD/NAD(P)-binding domain-containing protein [Wolfiporia cocos MD-104 SS10]
WC08036	673	244	742	7846	7771	2619	1833	1393	934	6.74985	L-gulonolactone/D-arabinono-1,4-lactone oxidase [Dichomitus squalens LYAD-421 SS1] &gt;lcl|EJF60122.1 L-gulonolactone/D-arabinono-1,4-lactone oxidase [Dichomitus squalens LYAD-421 SS1]
WC00639	389	242	461	12274	889	606	318	199	342	6.6978	NAD-dependent formate dehydrogenase [Dichomitus squalens LYAD-421 SS1] &gt;lcl|EJF60055.1 NAD-dependent formate dehydrogenase [Dichomitus squalens LYAD-421 SS1]
WC00712	339	221	372	3245	4450	2878	119	184	298	5.99464	FAD/NAD(P)-binding domain-containing protein [Wolfiporia cocos MD-104 SS10]
WC06903	1680	1042	2472	20296	28245	12003	574	173	349	5.93377	aromatic amino acid family biosynthesis-like protein [Polyporus brumalis]
WC11475	62	61	91	1562	376	225	54	101	113	5.67991	hypothetical protein FOMPIDRAFT_1054391 [Fomitopsis pinicola FP-58527 SS1]
WC08622	3	0	0	0	5	1	10	12	6	5.66667	NAD(P)-binding protein [Wolfiporia cocos MD-104 SS10]
WC08916	109	78	65	814	1518	455	4	7	20	5.59127	hypothetical protein WOLCODRAFT_167046 [Wolfiporia cocos MD-104 SS10]
WC08890	27	29	24	201	203	291	59	67	54	5.46875	monooxygenase [Wolfiporia cocos MD-104 SS10]
WC09938	433	430	528	3319	9076	1374	92	29	161	5.05068	hypothetical protein POSPLADRAFT_1173269 [Postia placenta MAD-698-R-SB12] &gt;lcl|OSX59026.1 hypothetical protein POSPLADRAFT_1173269 [Postia placenta MAD-698-R-SB12]
WC06891	135	78	129	702	515	768	380	416	458	4.73538	NAD(P)-binding protein [Wolfiporia cocos MD-104 SS10]
WC00390	3834	2002	4460	29705	42819	18747	2092	949	1273	4.64185	hypothetical protein PHLGIDRAFT_128913 [Phlebiopsis gigantea 11061_1 CR5-6]
WC07593	19	10	19	63	325	29	8	3	14	4.60417	FAD-binding domain-containing protein [Wolfiporia cocos MD-104 SS10]
WC04266	3692	1984	5351	34737	36355	5789	2988	2703	4092	3.92963	putative aminoadipate reductase [Laetiporus sulphureus 93-53]
WC07414	250	249	232	1092	685	1185	692	887	1104	3.86115	GMC oxidoreductase [Laetiporus sulphureus 93-53]
WC07497	143	103	149	297	215	265	961	541	683	3.74937	acetyl-CoA synthetase-like protein [Wolfiporia cocos MD-104 SS10]
WC07045	174	143	250	385	530	352	1656	532	766	3.72222	hypothetical protein POSPLADRAFT_1180365 [Postia placenta MAD-698-R-SB12] &gt;lcl|OSX63429.1 hypothetical protein POSPLADRAFT_1180365 [Postia placenta MAD-698-R-SB12]
WC04168	3	1	8	48	24	7	4	5	0	3.66667	NAD(P)-binding protein [Wolfiporia cocos MD-104 SS10]
WC02145	30	17	34	209	123	198	16	4	19	3.51235	FAD/NAD(P)-binding domain-containing protein [Wolfiporia cocos MD-104 SS10]
WC05234	85	67	88	98	124	98	299	397	646	3.4625	predicted protein [Fibroporia radiculosa] &gt;lcl|CCL99431.1 predicted protein [Fibroporia radiculosa]
WC11400	253	151	316	1368	1774	1285	307	67	133	3.42639	hypothetical protein CERSUDRAFT_111921 [Gelatoporia subvermispora B] &gt;lcl|ANT47062.1 thioredoxin reductase [Gelatoporia subvermispora]
WC07603	4	2	0	1	1	5	13	3	17	3.33333	NAD(P)-binding protein [Wolfiporia cocos MD-104 SS10]
WC07211	484	221	750	181	151	162	3562	2386	3256	3.33265	FAD/NAD(P)-binding domain-containing protein [Wolfiporia cocos MD-104 SS10]
WC07191	112	77	102	227	497	573	228	113	201	3.15979	NAD(P)-binding protein [Wolfiporia cocos MD-104 SS10]
WC03996	676	589	1045	634	256	427	1935	4945	6057	3.08528	alcohol dehydrogenase GroES domain protein [Wolfiporia cocos MD-104 SS10]
WC08530	323	195	221	1136	1148	636	692	377	538	3.06292	FAD-binding domain-containing protein [Wolfiporia cocos MD-104 SS10]
WC08892	105	79	92	285	197	183	281	286	369	2.90036	monooxygenase [Wolfiporia cocos MD-104 SS10]
WC02580	598	411	614	761	1689	2716	2193	901	1101	2.88386	NAD(P)-binding protein [Wolfiporia cocos MD-104 SS10]
WC10209	1093	640	1043	5307	3846	1168	3242	1179	1159	2.86401	hypothetical protein PHLCEN_2v11919 [Phlebia centrifuga]
WC00437	47	44	33	119	98	124	152	108	105	2.84677	amine oxidase [Wolfiporia cocos MD-104 SS10]
WC07625	71	74	55	156	770	56	73	26	56	2.8425	NAD(P)-binding protein [Wolfiporia cocos MD-104 SS10]
WC00656	2	9	3	0	0	0	47	16	16	2.82143	hypothetical protein WOLCODRAFT_108689 [Wolfiporia cocos MD-104 SS10]
WC10780	33	13	19	35	247	18	40	8	15	2.79231	FAD-binding domain-containing protein [Wolfiporia cocos MD-104 SS10]
WC09286	86	65	125	254	1035	133	43	27	42	2.77899	NAD(P)-binding protein [Wolfiporia cocos MD-104 SS10]
WC03162	1565	874	1664	6815	8245	3829	1711	960	1213	2.77516	Fe-S cluster assembly protein DRE2 [Wolfiporia cocos MD-104 SS10]
WC00540	218	67	212	1223	848	251	236	78	96	2.74849	NAD(P)-binding protein [Daedalea quercina L-15889]
WC05591	55	43	32	191	86	69	130	109	129	2.74615	NAD(P)-binding protein [Wolfiporia cocos MD-104 SS10]
WC07382	9713	5514	14923	76442	75346	12469	470	355	439	2.74496	hypothetical protein WOLCODRAFT_90172 [Wolfiporia cocos MD-104 SS10]
WC02517	310	190	276	2659	1124	182	86	73	98	2.72036	hypothetical protein FOMPIDRAFT_1054391 [Fomitopsis pinicola FP-58527 SS1]
WC10784	3	0	4	2	1	1	15	7	12	2.71429	NAD(P)-binding protein [Wolfiporia cocos MD-104 SS10]
WC08891	31	32	36	113	48	39	116	80	136	2.68687	monooxygenase [Wolfiporia cocos MD-104 SS10]
WC06061	89	34	134	49	96	41	539	274	369	2.66148	PREDICTED: bifunctional pinoresinol-lariciresinol reductase-like [Pyrus x bretschneideri]
WC08697	25	24	35	78	103	165	28	26	47	2.66071	hypothetical protein GSI_05467 [Ganoderma sinense ZZ0214-1]
WC08697	25	24	35	78	103	165	28	26	47	2.66071	hypothetical protein GSI_05467 [Ganoderma sinense ZZ0214-1]
WC07509	55	42	44	95	41	24	155	205	214	2.60284	acetyl-CoA synthetase-like protein [Wolfiporia cocos MD-104 SS10]
WC06500	904	527	1136	1973	5601	2487	1273	595	853	2.48968	hypothetical protein WOLCODRAFT_140412 [Wolfiporia cocos MD-104 SS10]
WC00586	61	43	37	27	37	66	227	107	207	2.37943	Flavin-containing monooxygenase FMO GS-OX-like 8 [Trametes pubescens]
WC03431	39	43	17	73	79	49	80	76	114	2.37879	cytochrome P450 [Laetiporus sulphureus 93-53]
WC09155	1551	1030	1577	9331	5079	1068	1448	835	1496	2.31566	hypothetical protein PUNSTDRAFT_119000 [Punctularia strigosozonata HHB-11173 SS5] &gt;lcl|EIN11736.1 hypothetical protein PUNSTDRAFT_119000 [Punctularia strigosozonata HHB-11173 SS5]
WC08889	538	552	327	336	267	381	2093	1460	1959	2.29217	hypothetical protein WOLCODRAFT_167026 [Wolfiporia cocos MD-104 SS10]
WC02133	861	572	971	3082	4118	1234	1085	467	561	2.19364	hypothetical protein POSPLADRAFT_1178892 [Postia placenta MAD-698-R-SB12] &gt;lcl|OSX65221.1 hypothetical protein POSPLADRAFT_1178892 [Postia placenta MAD-698-R-SB12]
WC07822	7	4	3	2	4	0	11	21	23	2.17857	amine oxidase [Obba rivulosa]
WC07498	551	314	1017	777	195	1023	2237	1682	2114	2.13284	acetyl-CoA synthetase-like protein [Wolfiporia cocos MD-104 SS10]
WC11384	35	18	14	11	16	43	92	54	65	2.09701	Thiol-specific monooxygenase [Sparassis crispa] &gt;lcl|GBE85212.1 Thiol-specific monooxygenase [Sparassis crispa]
WC05593	63	38	40	187	237	96	19	10	17	2.00709	NAD(P)-binding protein [Wolfiporia cocos MD-104 SS10]
WC04186	1	6	0	1	0	2	7	3	15	2	hypothetical protein WOLCODRAFT_108689 [Wolfiporia cocos MD-104 SS10]
WC00601	381	220	378	926	1228	989	243	68	112	1.82125	hypothetical protein CERSUDRAFT_111921 [Gelatoporia subvermispora B] &gt;lcl|ANT47062.1 thioredoxin reductase [Gelatoporia subvermispora]
WC10768	57	36	48	77	324	16	65	10	17	1.80496	FAD-binding domain-containing protein [Wolfiporia cocos MD-104 SS10]
WC08001	180	175	173	174	232	167	584	328	418	1.80208	amine oxidase [Trametes coccinea BRFM310]
WC00870	1570	1153	1369	1341	1505	1221	3015	2835	4275	1.73412	hypothetical protein POSPLADRAFT_1052317 [Postia placenta MAD-698-R-SB12] &gt;lcl|OSX68191.1 hypothetical protein POSPLADRAFT_1052317 [Postia placenta MAD-698-R-SB12]
WC04295	300	238	319	320	271	283	734	616	694	1.70245	hypothetical protein WOLCODRAFT_28871 [Wolfiporia cocos MD-104 SS10]
WC00529	66	50	72	188	83	106	122	56	70	1.66223	NAD(P)-binding protein [Wolfiporia cocos MD-104 SS10]
WC06399	353	333	297	1210	532	132	417	323	625	1.64751	hypothetical protein ARMGADRAFT_1166511 [Armillaria gallica]
WC07418	825	631	470	3911	1453	99	158	293	423	1.64512	alcohol oxidase [Jaapia argillacea MUCL 33604]
WC07192	3913	2680	3594	3761	10717	15430	1941	768	781	1.63925	NAD(P)-binding protein [Wolfiporia cocos MD-104 SS10]
WC11763	9	4	2	1	4	1	16	11	16	1.63333	NAD(P)-binding protein [Wolfiporia cocos MD-104 SS10]
WC08527	236	188	192	206	135	196	478	447	547	1.63068	FAD-binding domain-containing protein [Trametes coccinea BRFM310]
WC01864	108	54	193	545	260	94	109	53	92	1.62394	5-methylaminomethyl-2-thiouridylate-methyltransferase [Wolfiporia cocos MD-104 SS10]
WC00530	251	188	247	534	386	334	374	274	324	1.62245	NAD(P)-binding protein [Wolfiporia cocos MD-104 SS10]
WC00035	139	107	116	508	323	52	97	77	98	1.5953	FAD/NAD-binding domain-containing protein [Laetiporus sulphureus 93-53]
WC08896	42	27	33	60	110	35	51	35	33	1.58824	monooxygenase [Wolfiporia cocos MD-104 SS10]
WC05842	515	352	512	870	943	930	603	434	504	1.5533	NmrA-like family domain-containing protein 1 [Hypsizygus marmoreus]
WC06471	253	204	277	271	332	263	376	493	540	1.54973	hypothetical protein WOLCODRAFT_82152 [Wolfiporia cocos MD-104 SS10]
WC00914	11	6	5	6	4	4	37	6	10	1.52273	hypothetical protein WOLCODRAFT_108689 [Wolfiporia cocos MD-104 SS10]
WC08705	1399	928	895	1735	2805	2919	854	516	920	1.51288	squalene epoxidase [Wolfiporia cocos MD-104 SS10]
WC07274	97	74	50	73	42	46	203	119	184	1.50905	NAD(P)-binding protein [Wolfiporia cocos MD-104 SS10]
WC07187	8	4	1	2	3	4	8	3	19	1.5	NAD(P)-binding protein [Wolfiporia cocos MD-104 SS10]
WC11656	9	6	15	8	3	6	17	21	34	1.48333	acetyl-CoA synthetase-like protein [Wolfiporia cocos MD-104 SS10]
WC01889	746	458	865	486	842	1506	1381	829	743	1.3985	NEDD8-activating enzyme E1 catalytic subunit [Grifola frondosa]
WC07581	84	40	47	60	291	23	57	18	29	1.39766	FAD-binding domain-containing protein [Wolfiporia cocos MD-104 SS10]
WC01731	1695	993	2798	11116	1664	1300	405	282	438	1.3858	NAD-dependent formate dehydrogenase [Gelatoporia subvermispora]
WC11191	1	1	2	4	3	1	1	1	1	1.375	monooxygenase [Wolfiporia cocos MD-104 SS10]
WC01650	140	116	138	115	180	65	244	168	308	1.37056	FAD/NAD(P)-binding domain-containing protein [Wolfiporia cocos MD-104 SS10]
WC10137	82	61	57	74	74	95	122	57	124	1.365	FAD/NAD-binding domain-containing protein [Laetiporus sulphureus 93-53]
WC08386	636	488	757	321	559	202	1500	927	1571	1.35035	hypothetical protein GSI_10830 [Ganoderma sinense ZZ0214-1]
WC00733	318	214	236	423	291	284	494	208	374	1.35026	NAD(P)-binding protein, partial [Wolfiporia cocos MD-104 SS10]
WC00859	185	112	221	106	157	268	340	250	253	1.32625	FAD/NAD(P)-binding domain-containing protein [Wolfiporia cocos MD-104 SS10]
WC08886	1682	1544	1317	101	29	70	3746	2935	4956	1.30277	hypothetical protein WOLCODRAFT_127398, partial [Wolfiporia cocos MD-104 SS10]
WC08549	61	50	43	23	21	26	62	104	162	1.29221	NAD(P)-binding protein [Wolfiporia cocos MD-104 SS10]
WC10789	172	131	168	160	272	208	196	215	164	1.28981	predicted protein [Fibroporia radiculosa] &gt;lcl|CCM04264.1 predicted protein [Fibroporia radiculosa]
WC01004	154	84	113	341	180	99	119	79	82	1.28205	DNA-directed RNA polymerase I kDa polypeptide [Wolfiporia cocos MD-104 SS10]
WC08026	241	148	207	350	225	288	311	123	227	1.27852	hypothetical protein WOLCODRAFT_47734, partial [Wolfiporia cocos MD-104 SS10]
WC08026	241	148	207	350	225	288	311	123	227	1.27852	hypothetical protein WOLCODRAFT_47734, partial [Wolfiporia cocos MD-104 SS10]
WC04378	750	556	952	584	1013	859	1502	725	1028	1.26461	NADPH oxidase [Polyporus umbellatus]
WC09580	1461	939	963	2161	3445	674	1723	142	338	1.26123	FAD dependent oxidoreductase [Wolfiporia cocos MD-104 SS10]
WC07845	362	103	541	221	240	384	620	390	626	1.2331	hypothetical protein BN946_scf184590.g5 [Trametes cinnabarina]
WC08326	24	23	29	21	17	7	48	46	47	1.22368	monooxygenase [Laetiporus sulphureus 93-53]
WC08855	85	58	113	159	132	52	97	88	98	1.22266	monooxygenase [Wolfiporia cocos MD-104 SS10]
WC01067	260	204	253	98	172	170	785	182	323	1.20642	NAD-binding protein [Fomitopsis pinicola FP-58527 SS1]
WC08723	288	183	271	265	1208	56	102	67	88	1.2035	FAD/NAD P-binding domain-containing protein [Gloeophyllum trabeum ATCC 11539] &gt;lcl|EPQ60566.1 FAD/NAD P-binding domain-containing protein [Gloeophyllum trabeum ATCC 11539]
WC11071	6	1	3	3	3	1	13	1	3	1.2	hypothetical protein WOLCODRAFT_108689 [Wolfiporia cocos MD-104 SS10]
WC10769	3	4	1	5	0	5	2	2	5	1.1875	hypothetical protein K443DRAFT_680693 [Laccaria amethystina LaAM-08-1]
WC10295	1513	1119	1291	1147	1854	1596	2237	1100	1306	1.17767	hypothetical protein WOLCODRAFT_78972 [Wolfiporia cocos MD-104 SS10]
WC06632	791	381	1034	490	502	682	787	1091	1344	1.1097	Probable NADH [Sparassis crispa] &gt;lcl|GBE80466.1 Probable NADH [Sparassis crispa]
WC09606	495	304	571	973	706	463	415	196	257	1.09854	hypothetical protein LAESUDRAFT_760202 [Laetiporus sulphureus 93-53]
WC06869	377	251	215	453	325	391	218	171	282	1.09134	predicted protein, partial [Postia placenta Mad-698-R]
WC03186	51	59	33	17	78	60	69	39	46	1.08042	DNA photolyase [Daedalea quercina L-15889]
WC02993	2018	994	1308	316	424	907	2995	1515	3121	1.07384	oxidoreductase [Obba rivulosa]
WC04042	6958	4826	7795	7165	8499	10568	7938	2767	4543	1.0593	NADPH oxidase [Polyporus brumalis]
WC03999	752	443	1155	579	658	1444	1579	212	421	1.04106	hypothetical protein CERSUDRAFT_115004 [Gelatoporia subvermispora B]
WC06777	820	552	800	559	736	804	894	573	948	1.03913	hypothetical protein SERLADRAFT_442714 [Serpula lacrymans var. lacrymans S7.9] &gt;lcl|EGO19897.1 hypothetical protein SERLADRAFT_442714 [Serpula lacrymans var. lacrymans S7.9]
WC00837	69	71	57	30	32	34	49	105	159	1.03807	hypothetical protein WOLCODRAFT_147072 [Wolfiporia cocos MD-104 SS10]
WC06533	477	344	533	268	280	281	839	443	697	1.03693	FAD dependent oxidoreductase [Obba rivulosa]
WC08239	1091	906	1172	388	4089	230	426	578	853	1.03566	predicted protein [Fibroporia radiculosa] &gt;lcl|CCM01014.1 predicted protein [Fibroporia radiculosa]
WC04328	89	57	63	51	52	49	64	88	127	1.0311	Phosphomutase-like protein 3 [Grifola frondosa]
WC09755	604	453	520	1108	412	212	553	420	515	1.02093	hypothetical protein POSPLADRAFT_1137551 [Postia placenta MAD-698-R-SB12] &gt;lcl|EED81883.1 predicted protein [Postia placenta Mad-698-R] &gt;lcl|OSX64071.1 hypothetical protein POSPLADRAFT_1137551 [Postia placenta MAD-698-R-SB12]
WC08241	976	482	2154	325	291	290	2175	1573	2699	1.01786	FAD/NAD(P)-binding domain-containing protein [Wolfiporia cocos MD-104 SS10]
WC08392	393	193	256	286	186	234	350	216	405	0.995843	NAD(P)-binding protein [Daedalea quercina L-15889]
WC06486	172	110	171	121	125	98	263	119	175	0.994481	hypothetical protein PYCCODRAFT_1386005 [Trametes coccinea BRFM310]
WC00489	1588	992	1168	771	1925	1576	1387	676	1032	0.982791	hypothetical protein GSI_15055 [Ganoderma sinense ZZ0214-1]
WC00039	328	187	208	349	209	58	282	193	325	0.979253	FAD/NAD-binding domain-containing protein [Laetiporus sulphureus 93-53]
WC03428	8	4	5	3	3	4	8	3	12	0.970588	NAD(P)-binding protein [Laetiporus sulphureus 93-53]
WC11752	5	6	6	7	3	5	6	4	7	0.941176	NAD(P)-binding protein [Wolfiporia cocos MD-104 SS10]
WC06852	1147	771	1028	759	967	927	1390	550	924	0.936354	hypothetical protein PISMIDRAFT_676289 [Pisolithus microcarpus 441]
WC06852	1147	771	1028	759	967	927	1390	550	924	0.936354	hypothetical protein PISMIDRAFT_676289 [Pisolithus microcarpus 441]
WC11192	31	32	22	48	24	14	20	14	39	0.935294	monooxygenase [Wolfiporia cocos MD-104 SS10]
WC07770	710	458	652	357	2179	157	440	66	179	0.928022	hypothetical protein TRAVEDRAFT_150625 [Trametes versicolor FP-101664 SS1] &gt;lcl|EIW57956.1 hypothetical protein TRAVEDRAFT_150625 [Trametes versicolor FP-101664 SS1]
WC03456	174	142	137	144	98	44	128	191	230	0.921634	FAD-binding domain-containing protein [Sistotremastrum niveocremeum HHB9708] &gt;lcl|KZT32982.1 FAD-binding domain-containing protein [Sistotremastrum suecicum HHB10207 ss-3]
WC08901	102	64	70	30	15	17	58	152	161	0.917373	monooxygenase [Wolfiporia cocos MD-104 SS10]
WC07500	139	104	143	245	162	26	62	94	118	0.915803	acetyl-CoA synthetase-like protein [Wolfiporia cocos MD-104 SS10]
WC07599	177	95	166	121	185	178	105	99	105	0.905251	predicted protein [Fibroporia radiculosa] &gt;lcl|CCM04264.1 predicted protein [Fibroporia radiculosa]
WC00212	318	247	293	129	87	123	335	367	476	0.884033	predicted protein [Fibroporia radiculosa] &gt;lcl|CCM05434.1 predicted protein [Fibroporia radiculosa]
WC02994	1686	889	1185	128	145	375	2256	1357	2313	0.874202	NAD-binding protein [Fomitopsis pinicola FP-58527 SS1]
WC04596	1682	1195	1837	2959	1953	607	813	658	1197	0.868371	hypothetical protein FOMPIDRAFT_1029465 [Fomitopsis pinicola FP-58527 SS1]
WC11627	108	102	103	74	46	51	155	102	111	0.861022	FAD-binding domain-containing protein [Wolfiporia cocos MD-104 SS10]
WC02995	903	523	1451	424	722	728	1405	502	1084	0.845499	hypothetical protein PHACADRAFT_137147 [Phanerochaete carnosa HHB-10118-sp] &gt;lcl|EKM59418.1 hypothetical protein PHACADRAFT_137147 [Phanerochaete carnosa HHB-10118-sp]
WC02007	756	484	773	592	411	479	545	525	833	0.840785	FAD/NAD(P)-binding domain-containing protein [Lentinus tigrinus ALCF2SS1-6]
WC01715	361	254	276	141	779	64	233	100	174	0.8367	mitochondrial NADH dehydrogenase [Daedalea quercina L-15889]
WC10092	1	2	3	0	4	1	1	3	1	0.833333	C-factor [Wolfiporia cocos MD-104 SS10]
WC08444	25	31	20	16	40	20	16	15	18	0.822368	NAD(P)-binding protein [Wolfiporia cocos MD-104 SS10]
WC03539	278	207	295	102	248	200	246	181	302	0.819872	hypothetical protein FOMPIDRAFT_1118818 [Fomitopsis pinicola FP-58527 SS1]
WC07616	18	13	5	2	19	2	21	12	3	0.819444	NAD(P)-binding protein [Wolfiporia cocos MD-104 SS10]
WC00862	878	330	1233	146	311	366	1135	788	1215	0.811348	FAD/NAD-binding domain-containing protein [Fomitopsis pinicola FP-58527 SS1]
WC04860	90	52	92	85	101	13	94	20	63	0.803419	NAD(P)-binding protein [Wolfiporia cocos MD-104 SS10]
WC08963	111	75	106	96	106	114	66	32	53	0.799658	FAD/NAD(P)-binding domain-containing protein [Wolfiporia cocos MD-104 SS10]
WC05639	72	73	95	10	13	21	127	95	116	0.795833	hypothetical protein FOMPIDRAFT_1038850 [Fomitopsis pinicola FP-58527 SS1]
WC05940	775	508	996	916	743	458	669	392	425	0.790478	GMP synthase [Trametes versicolor FP-101664 SS1] &gt;lcl|EIW57677.1 GMP synthase [Trametes versicolor FP-101664 SS1]
WC01974	624	410	658	704	926	322	423	82	165	0.774823	predicted protein [Fibroporia radiculosa] &gt;lcl|CCM02380.1 predicted protein [Fibroporia radiculosa]
WC08673	789	498	1218	434	824	256	648	744	966	0.772854	predicted protein [Sparassis crispa] &gt;lcl|GBE85762.1 predicted protein [Sparassis crispa]
WC05123	133	134	89	21	35	28	64	131	270	0.771067	hypothetical protein POSPLADRAFT_1185423 [Postia placenta MAD-698-R-SB12] &gt;lcl|EED84064.1 predicted protein [Postia placenta Mad-698-R] &gt;lcl|OSX57989.1 hypothetical protein POSPLADRAFT_1185423 [Postia placenta MAD-698-R-SB12]
WC10236	144	83	126	72	26	88	77	163	118	0.770538	FAD/NAD-P-binding domain-containing protein [Laetiporus sulphureus 93-53]
WC08515	281	178	207	190	128	67	186	196	254	0.766517	D-aspartate oxidase [Wolfiporia cocos MD-104 SS10]
WC08911	1736	1077	1896	1044	2174	729	1680	585	985	0.764175	NAD(P)-binding protein [Wolfiporia cocos MD-104 SS10]
WC10400	21	27	31	2	8	14	50	17	28	0.753165	hypothetical protein WOLCODRAFT_134507 [Wolfiporia cocos MD-104 SS10]
WC08857	4	0	2	2	1	1	1	2	2	0.75	predicted protein [Fibroporia radiculosa] &gt;lcl|CCM01285.1 predicted protein [Fibroporia radiculosa]
WC10916	888	607	922	395	808	737	677	349	650	0.748035	predicted protein [Postia placenta Mad-698-R]
WC07171	629	344	486	246	366	269	485	315	487	0.742975	NAD(P)-binding protein [Daedalea quercina L-15889]
WC08957	751	560	699	546	436	327	517	507	651	0.742289	hypothetical protein CERSUDRAFT_57324, partial [Gelatoporia subvermispora B]
WC06164	2697	2015	2745	1693	2130	2029	2056	1330	1805	0.740445	Pkinase-domain-containing protein [Wolfiporia cocos MD-104 SS10]
WC05666	149	102	132	105	91	54	100	103	114	0.740209	NAD(P)-binding protein [Wolfiporia cocos MD-104 SS10]
WC09736	421	246	427	436	509	105	316	83	167	0.738574	hypothetical protein PHLGIDRAFT_26333 [Phlebiopsis gigantea 11061_1 CR5-6]
WC09626	10	7	4	4	2	3	6	9	7	0.738095	NAD(P)-binding protein [Wolfiporia cocos MD-104 SS10]
WC00851	482	287	573	647	564	252	284	113	115	0.735842	actin-like ATPase domain-containing protein [Wolfiporia cocos MD-104 SS10]
WC06787	702	501	592	220	91	125	581	662	960	0.735097	iron reductase [Wolfiporia cocos MD-104 SS10]
WC06488	534	404	410	174	98	140	465	512	592	0.734792	hypothetical protein WOLCODRAFT_108689 [Wolfiporia cocos MD-104 SS10]
WC08583	138	23	542	508	348	128	24	9	16	0.734708	NAD(P)-binding protein [Wolfiporia cocos MD-104 SS10]
WC11365	149	102	83	24	14	58	105	133	156	0.733533	FAD/NAD(P)-binding domain-containing protein, partial [Wolfiporia cocos MD-104 SS10]
WC10743	447	251	482	140	245	276	322	281	465	0.732627	ATP-NAD kinase [Wolfiporia cocos MD-104 SS10]
WC02065	2911	1619	4612	3087	3417	1755	1862	1218	2018	0.730529	hypothetical protein GSI_13916 [Ganoderma sinense ZZ0214-1]
WC04355	23	16	42	19	18	16	21	17	27	0.728395	hypothetical protein DAEQUDRAFT_754869 [Daedalea quercina L-15889]
WC00238	47	43	51	30	14	28	24	56	53	0.72695	Phosphomutase-like protein 3 [Grifola frondosa]
WC08678	206	86	509	175	589	101	142	55	101	0.725968	salicylate 1-monooxygenase [Wolfiporia cocos MD-104 SS10]
WC05505	48	45	34	12	49	34	53	8	27	0.720472	FAD/NAD-binding domain-containing protein [Fomitopsis pinicola FP-58527 SS1]
WC01542	1073	750	1113	370	674	701	1166	451	842	0.71594	NADPH oxidase [Polyporus umbellatus]
WC03434	69	102	48	96	103	40	18	17	39	0.714612	hypothetical protein GSI_05467 [Ganoderma sinense ZZ0214-1]
WC06186	7371	4888	8093	1179	2707	3431	8544	5756	7164	0.70708	hypothetical protein POSPLADRAFT_1179899 [Postia placenta MAD-698-R-SB12] &gt;lcl|OSX64249.1 hypothetical protein POSPLADRAFT_1179899 [Postia placenta MAD-698-R-SB12]
WC08989	168	107	127	61	72	112	153	55	104	0.692786	FAD/NAD-binding domain-containing protein [Laetiporus sulphureus 93-53]
WC07992	1010	583	1051	328	249	554	956	636	909	0.686838	NAD(P)-binding protein [Wolfiporia cocos MD-104 SS10]
WC04977	857	527	1011	550	517	422	591	530	591	0.668267	UDP-glucose 4-epimerase [Neolentinus lepideus HHB14362 ss-1]
WC07041	1224	803	1220	480	628	957	1078	433	682	0.655682	NAD(P)-binding protein [Wolfiporia cocos MD-104 SS10]
WC06063	290	191	278	54	48	44	229	264	354	0.65415	NAD(P)-binding protein [Wolfiporia cocos MD-104 SS10]
WC06357	722	592	684	227	234	205	555	556	824	0.650901	FAD/NAD(P)-binding domain-containing protein [Daedalea quercina L-15889]
WC04548	473	324	470	205	312	122	393	267	325	0.640884	predicted protein [Fibroporia radiculosa] &gt;lcl|CCM04199.1 predicted protein [Fibroporia radiculosa]
WC10938	163	77	127	23	184	47	93	36	86	0.638965	hypothetical protein SERLA73DRAFT_188918 [Serpula lacrymans var. lacrymans S7.3]
WC06480	1049	663	1006	259	288	213	1121	633	939	0.63521	hypothetical protein WOLCODRAFT_140412 [Wolfiporia cocos MD-104 SS10]
WC10089	298	257	233	90	61	103	273	226	241	0.630711	C-factor [Wolfiporia cocos MD-104 SS10]
WC09921	10	8	9	6	4	1	7	7	9	0.62963	acetyl-CoA synthetase-like protein [Laetiporus sulphureus 93-53]
WC00213	2810	2099	3292	1145	2701	936	1818	1569	2149	0.62907	NAD(P)-binding protein [Wolfiporia cocos MD-104 SS10]
WC08846	1226	1109	676	329	223	244	959	781	1132	0.6091	monooxygenase [Wolfiporia cocos MD-104 SS10]
WC07604	7	5	12	7	1	0	2	17	2	0.604167	NAD(P)-binding protein [Wolfiporia cocos MD-104 SS10]
WC11696	739	460	932	347	399	362	674	254	517	0.599015	hypothetical protein WOLCODRAFT_137910 [Wolfiporia cocos MD-104 SS10]
WC00867	4771	3139	4106	412	992	1010	3841	2922	5179	0.59737	FAD/NAD(P)-binding domain-containing protein [Daedalea quercina L-15889]
WC07826	120	57	114	17	49	38	101	43	98	0.594502	NAD(P)-binding protein [Wolfiporia cocos MD-104 SS10]
WC04123	106	83	115	47	39	20	107	67	80	0.592105	FAD-binding domain-containing protein [Wolfiporia cocos MD-104 SS10]
WC02144	204	118	138	54	84	35	125	98	142	0.584783	FAD/NAD(P)-binding domain-containing protein [Wolfiporia cocos MD-104 SS10]
WC04966	1012	546	891	862	588	354	398	222	439	0.584524	uroporphyrin-III C-methyltransferase [Polyporus brumalis]
WC06720	14	9	8	2	1	9	14	4	6	0.580645	acetyl-CoA synthetase-like protein [Wolfiporia cocos MD-104 SS10]
WC11815	321	193	304	147	191	183	100	139	185	0.577628	hypothetical protein SCP_0506450 [Sparassis crispa] &gt;lcl|GBE83590.1 hypothetical protein SCP_0506450 [Sparassis crispa]
WC06493	1546	1797	2939	764	2753	1573	572	746	842	0.577046	hypothetical protein WOLCODRAFT_28542 [Wolfiporia cocos MD-104 SS10]
WC05270	180	141	161	47	53	38	176	114	128	0.576763	FAD/NAD-P-binding domain-containing protein [Lentinus tigrinus ALCF2SS1-7]
WC11697	16	24	39	14	28	22	6	3	18	0.575949	hypothetical protein WOLCODRAFT_152461 [Wolfiporia cocos MD-104 SS10]
WC04987	1867	1242	1830	851	699	430	1196	1017	1480	0.574307	hypothetical protein FOMPIDRAFT_1033676 [Fomitopsis pinicola FP-58527 SS1]
WC05469	33	32	44	9	11	5	26	37	37	0.573394	predicted protein [Postia placenta Mad-698-R]
WC01351	1790	1180	2088	467	495	624	2159	818	1118	0.561586	FAD-binding domain-containing protein [Lentinus tigrinus ALCF2SS1-7]
WC03450	69	43	48	14	10	7	23	45	80	0.559375	FAD-binding domain-containing protein [Wolfiporia cocos MD-104 SS10]
WC08215	5357	2925	5452	1193	7150	1172	3079	1063	1674	0.55814	hypothetical protein CERSUDRAFT_118311 [Gelatoporia subvermispora B]
WC04371	58	30	47	25	41	16	29	15	24	0.555556	hypothetical protein LAESUDRAFT_668561 [Laetiporus sulphureus 93-53]
WC11385	4	5	2	1	0	4	2	0	5	0.545455	short-chain dehydrogenase/reductase SDR [Wolfiporia cocos MD-104 SS10]
WC05150	143	81	119	11	8	12	116	82	145	0.54519	FAD dependent oxidoreductase [Wolfiporia cocos MD-104 SS10]
WC09876	8	8	18	5	3	2	5	7	15	0.544118	hypothetical protein POSPLADRAFT_1173269 [Postia placenta MAD-698-R-SB12] &gt;lcl|OSX59026.1 hypothetical protein POSPLADRAFT_1173269 [Postia placenta MAD-698-R-SB12]
WC03226	292	150	236	118	141	110	130	73	157	0.537611	hypothetical protein CVT24_004025 [Panaeolus cyanescens]
WC08652	1859	1047	2256	255	1065	768	1608	738	1078	0.533902	proteasome subunit [Wolfiporia cocos MD-104 SS10]
WC07716	298	183	309	74	86	76	195	161	244	0.529114	hypothetical protein WOLCODRAFT_163919 [Wolfiporia cocos MD-104 SS10]
WC05559	185	107	116	48	23	33	91	68	165	0.52451	FAD/NAD(P)-binding domain-containing protein [Wolfiporia cocos MD-104 SS10]
WC03443	3610	2520	3437	2849	2249	1128	1817	780	1186	0.5231	hypothetical protein POSPLADRAFT_1040413 [Postia placenta MAD-698-R-SB12] &gt;lcl|OSX61262.1 hypothetical protein POSPLADRAFT_1040413 [Postia placenta MAD-698-R-SB12]
WC05595	3587	2242	2325	967	1837	2061	1473	993	1188	0.522382	NAD(P)-binding protein [Wolfiporia cocos MD-104 SS10]
WC05825	801	377	1007	195	486	314	525	320	439	0.52151	GMC oxidoreductase [Wolfiporia cocos MD-104 SS10]
WC01534	47	41	64	13	53	18	37	13	24	0.519737	hypothetical protein WOLCODRAFT_94052 [Wolfiporia cocos MD-104 SS10]
WC03549	916	682	761	222	326	262	621	434	576	0.51738	enolase C-terminal domain-like protein [Lentinus tigrinus ALCF2SS1-6] &gt;lcl|RPD74101.1 enolase C-terminal domain-like protein [Lentinus tigrinus ALCF2SS1-7]
WC04725	341	223	338	53	82	95	268	180	251	0.514967	oxidoreductase [Wolfiporia cocos MD-104 SS10]
WC03490	802	735	665	649	335	86	422	270	495	0.512489	acetyl-CoA synthetase-like protein [Sparassis crispa] &gt;lcl|GBE83916.1 acetyl-CoA synthetase-like protein [Sparassis crispa]
WC01383	3706	2084	3809	1674	2014	1845	1654	1054	1543	0.509636	NADH-cytochrome b5 reductase [Daedalea quercina L-15889]
WC06862	5070	5652	2464	1630	1870	1820	1831	3152	3009	0.504778	hypothetical protein GSI_05467 [Ganoderma sinense ZZ0214-1]
WC03277	482	319	557	88	124	102	371	215	470	0.504418	ubiquinone biosynthesis hydrox [Dichomitus squalens LYAD-421 SS1] &gt;lcl|EJF64010.1 ubiquinone biosynthesis hydrox [Dichomitus squalens LYAD-421 SS1]
WC00249	3093	2018	3307	917	1544	1160	1934	1432	1498	0.50398	NADH dehydrogenase [Wolfiporia cocos MD-104 SS10]
WC07326	818	344	1053	691	694	233	243	149	217	0.502709	predicted protein [Fibroporia radiculosa] &gt;lcl|CCM05823.1 predicted protein [Fibroporia radiculosa]
WC11190	310	148	426	223	356	59	112	52	85	0.501697	monooxygenase [Wolfiporia cocos MD-104 SS10]
WC11435	155	96	101	34	67	33	83	36	99	0.5	GMC oxidoreductase [Trametes coccinea BRFM310]
WC00026	1178	684	1796	173	348	586	977	582	983	0.49877	FAD/NAD(P)-binding domain-containing protein [Laetiporus sulphureus 93-53]
WC10621	237	137	289	39	57	55	193	134	178	0.494721	FAD/NAD(P)-binding domain-containing protein [Wolfiporia cocos MD-104 SS10]
WC09724	63	46	46	24	15	23	44	16	30	0.490323	--
WC07062	7387	5468	7173	5455	5581	2705	2558	1213	2128	0.490314	hypothetical protein BN946_scf185015.g7 [Trametes cinnabarina]
WC05524	9133	5004	10836	6754	8229	3049	2162	1258	2963	0.488828	fumarate reductase [Trametes versicolor FP-101664 SS1] &gt;lcl|EIW62857.1 fumarate reductase [Trametes versicolor FP-101664 SS1]
WC07162	93	66	57	23	18	20	52	43	55	0.488426	predicted protein [Postia placenta Mad-698-R]
WC02286	456	296	484	97	118	148	417	131	292	0.48665	D-lactate dehydrogenase [cytochrome], mitochondrial [Sparassis crispa] &gt;lcl|GBE86673.1 D-lactate dehydrogenase [cytochrome], mitochondrial [Sparassis crispa]
WC07195	100	57	122	27	32	30	77	44	61	0.485663	FAD/NAD(P)-binding domain-containing protein [Wolfiporia cocos MD-104 SS10]
WC02086	2900	1931	2578	386	453	638	1768	1594	2321	0.483196	NAD(P) transhydrogenase mitochondrial precursor [Daedalea quercina L-15889]
WC11182	458	431	251	89	42	75	296	243	353	0.481579	monooxygenase [Wolfiporia cocos MD-104 SS10]
WC03596	708	493	941	167	158	170	530	379	643	0.477824	acetyl-CoA synthetase-like protein [Wolfiporia cocos MD-104 SS10]
WC07650	426	311	226	121	67	67	166	207	290	0.476636	hypothetical protein POSPLADRAFT_1184700 [Postia placenta MAD-698-R-SB12] &gt;lcl|OSX59006.1 hypothetical protein POSPLADRAFT_1184700 [Postia placenta MAD-698-R-SB12]
WC06633	331	181	467	85	56	108	186	226	272	0.476507	hypothetical protein CERSUDRAFT_159950 [Gelatoporia subvermispora B]
WC10848	873	628	771	187	199	179	737	261	601	0.476232	hypothetical protein POSPLADRAFT_1034553 [Postia placenta MAD-698-R-SB12] &gt;lcl|OSX61009.1 hypothetical protein POSPLADRAFT_1034553 [Postia placenta MAD-698-R-SB12]
WC01094	660	412	603	121	151	151	450	284	437	0.475821	NAD(P)-binding protein [Wolfiporia cocos MD-104 SS10]
WC02641	690	474	665	438	347	216	290	166	273	0.472936	FAD/NAD(P)-binding domain-containing protein [Polyporus brumalis]
WC10991	91	92	48	23	19	26	55	42	53	0.471861	monooxygenase [Laetiporus sulphureus 93-53]
WC02581	1122	940	1079	710	829	453	578	106	255	0.466571	NAD(P)-binding protein [Wolfiporia cocos MD-104 SS10]
WC08862	397	340	216	113	35	38	174	177	350	0.465373	hypothetical protein POSPLADRAFT_1145652 [Postia placenta MAD-698-R-SB12] &gt;lcl|OSX61770.1 hypothetical protein POSPLADRAFT_1145652 [Postia placenta MAD-698-R-SB12]
WC08770	788	445	717	193	264	230	501	241	360	0.458718	glucose-inhibited division protein A subfamily [Daedalea quercina L-15889]
WC08967	864	563	909	140	305	212	463	401	622	0.45869	FAD/NAD(P)-binding domain-containing protein [Dichomitus squalens LYAD-421 SS1] &gt;lcl|EJF59716.1 FAD/NAD(P)-binding domain-containing protein [Dichomitus squalens LYAD-421 SS1]
WC00731	3107	2222	3458	1102	1645	1413	1439	922	1507	0.456811	NADH-ubiquinone oxidoreductase 51 kDa subunit, mitochondrial [Sparassis crispa] &gt;lcl|GBE84154.1 NADH-ubiquinone oxidoreductase 51 kDa subunit, mitochondrial [Sparassis crispa]
WC05252	11	5	41	8	10	1	7	11	15	0.45614	NAD(P)-binding protein [Wolfiporia cocos MD-104 SS10]
WC05592	670	509	238	243	187	172	242	220	228	0.455893	hypothetical protein POSPLADRAFT_1043993 [Postia placenta MAD-698-R-SB12] &gt;lcl|OSX66615.1 hypothetical protein POSPLADRAFT_1043993 [Postia placenta MAD-698-R-SB12]
WC04726	230	215	266	143	68	34	162	101	139	0.454993	oxidoreductase [Wolfiporia cocos MD-104 SS10]
WC07791	368	135	308	30	29	49	138	217	274	0.454377	FAD/NAD(P)-binding domain-containing protein [Wolfiporia cocos MD-104 SS10]
WC05168	83	44	92	10	31	26	39	25	67	0.452055	NAD(P)-binding protein [Wolfiporia cocos MD-104 SS10]
WC05175	1205	905	685	442	459	480	402	322	400	0.448122	hypothetical protein WOLCODRAFT_153965 [Wolfiporia cocos MD-104 SS10]
WC06914	1623	932	1683	355	718	588	1000	401	702	0.444077	hypothetical protein CERSUDRAFT_118802 [Gelatoporia subvermispora B]
WC02749	112	95	226	69	69	33	49	52	112	0.443418	NAD-dependent epimerase/dehydratase [Obba rivulosa]
WC03866	68	28	45	4	9	5	35	20	52	0.443262	incomplete iron reductase [Trametes coccinea BRFM310]
WC04167	2191	748	3656	841	3661	398	613	112	210	0.442381	NAD(P)-binding protein [Wolfiporia cocos MD-104 SS10]
WC03977	321	224	395	274	178	125	77	57	98	0.430319	hypothetical protein SCP_0506450 [Sparassis crispa] &gt;lcl|GBE83590.1 hypothetical protein SCP_0506450 [Sparassis crispa]
WC06207	850	523	971	196	1018	85	494	86	130	0.428541	trans-2-enoyl-CoA reductase [Wolfiporia cocos MD-104 SS10]
WC07479	395	174	304	36	22	57	188	225	220	0.428408	predicted protein [Fibroporia radiculosa] &gt;lcl|CCM06073.1 predicted protein [Fibroporia radiculosa]
WC07486	101	98	136	16	6	10	101	64	90	0.428358	hypothetical protein FOMPIDRAFT_1038850 [Fomitopsis pinicola FP-58527 SS1]
WC04137	3522	2386	3889	478	193	320	3436	1290	2663	0.427682	alcohol dehydrogenase GroES domain protein [Wolfiporia cocos MD-104 SS10]
WC04704	687	443	600	483	314	243	211	89	128	0.424277	FAD/NAD(P)-binding domain-containing protein [Laetiporus sulphureus 93-53]
WC08310	1159	783	1184	344	341	281	671	376	609	0.419386	GMC oxidoreductase [Polyporus brumalis]
WC11550	62	50	30	17	6	4	43	19	30	0.419014	GMC oxidoreductase [Trametes cinnabarina]
WC03867	510	329	543	136	189	173	197	193	259	0.414978	hypothetical protein WOLCODRAFT_141288 [Wolfiporia cocos MD-104 SS10]
WC03057	511	329	458	65	116	80	349	187	259	0.40678	FAD dependent oxidoreductase [Wolfiporia cocos MD-104 SS10]
WC11099	842	467	862	206	263	295	339	264	389	0.404422	hypothetical protein POSPLADRAFT_1166711 [Postia placenta MAD-698-R-SB12] &gt;lcl|OSX66765.1 hypothetical protein POSPLADRAFT_1166711 [Postia placenta MAD-698-R-SB12]
WC11741	59	49	72	20	16	8	30	13	57	0.4	FAD/NAD(P)-binding domain-containing protein [Laetiporus sulphureus 93-53]
WC09546	1883	1174	2052	613	673	468	920	544	866	0.399687	NAD(P)-binding protein [Wolfiporia cocos MD-104 SS10]
WC08170	1170	683	823	228	179	281	446	437	542	0.394806	hypothetical protein DAEQUDRAFT_705606 [Daedalea quercina L-15889]
WC10657	890	485	981	210	248	311	606	201	284	0.394737	NAD(P)-binding protein [Wolfiporia cocos MD-104 SS10]
WC09905	3066	2020	2960	502	1000	862	1017	1385	1582	0.394482	hypothetical protein POSPLADRAFT_1165750 [Postia placenta MAD-698-R-SB12] &gt;lcl|OSX65715.1 hypothetical protein POSPLADRAFT_1165750 [Postia placenta MAD-698-R-SB12]
WC02692	1718	1050	2396	426	993	682	1017	386	563	0.393784	hypothetical protein HETIRDRAFT_408559 [Heterobasidion irregulare TC 32-1] &gt;lcl|ETW84519.1 hypothetical protein HETIRDRAFT_408559 [Heterobasidion irregulare TC 32-1]
WC11183	282	244	138	36	38	17	185	98	148	0.393072	monooxygenase [Wolfiporia cocos MD-104 SS10]
WC10704	299	124	482	49	201	95	162	66	138	0.392818	dihydrolipoyl dehydrogenase [Neolentinus lepideus HHB14362 ss-1]
WC06886	56	15	70	10	10	8	24	29	29	0.390071	NAD(P)-binding protein [Wolfiporia cocos MD-104 SS10]
WC06008	280	206	328	200	212	94	50	23	43	0.382064	NAD(P)-binding protein [Wolfiporia cocos MD-104 SS10]
WC01011	653	424	800	78	137	150	377	285	407	0.381993	hypothetical protein GSI_06937 [Ganoderma sinense ZZ0214-1]
WC07559	840	574	1049	211	280	286	439	229	408	0.376167	hypothetical protein WOLCODRAFT_137910 [Wolfiporia cocos MD-104 SS10]
WC05624	297	263	213	28	24	83	152	129	156	0.369987	hypothetical protein FOMPIDRAFT_1033475 [Fomitopsis pinicola FP-58527 SS1]
WC00073	294	171	281	33	180	58	121	57	100	0.367962	hypothetical protein SERLA73DRAFT_188918 [Serpula lacrymans var. lacrymans S7.3]
WC04046	6265	4025	6441	1325	2634	1622	2921	1462	2214	0.363935	hypothetical protein HETIRDRAFT_389115 [Heterobasidion irregulare TC 32-1] &gt;lcl|ETW77526.1 hypothetical protein HETIRDRAFT_389115 [Heterobasidion irregulare TC 32-1]
WC08394	391	206	398	43	78	54	233	97	210	0.359296	hypothetical protein PHACADRAFT_253802 [Phanerochaete carnosa HHB-10118-sp] &gt;lcl|EKM56587.1 hypothetical protein PHACADRAFT_253802 [Phanerochaete carnosa HHB-10118-sp]
WC04140	916	391	1198	269	1024	63	125	123	190	0.358084	NAD(P)-binding protein [Wolfiporia cocos MD-104 SS10]
WC01894	1504	969	1938	249	340	354	913	467	825	0.356835	hypothetical protein DICSQDRAFT_93322 [Dichomitus squalens LYAD-421 SS1] &gt;lcl|EJF56636.1 hypothetical protein DICSQDRAFT_93322 [Dichomitus squalens LYAD-421 SS1]
WC05256	766	490	809	124	290	167	413	196	274	0.354479	hypothetical protein FOMPIDRAFT_52102 [Fomitopsis pinicola FP-58527 SS1]
WC02317	2454	1258	3298	734	1781	615	864	386	585	0.354137	hypothetical protein JAAARDRAFT_205643 [Jaapia argillacea MUCL 33604]
WC03709	1205	885	1192	126	155	181	755	364	724	0.351158	FAD/NAD(P)-binding domain-containing protein [Wolfiporia cocos MD-104 SS10]
WC11195	364	279	176	86	25	27	97	109	231	0.351038	monooxygenase [Wolfiporia cocos MD-104 SS10]
WC04269	49	42	32	6	5	4	29	15	27	0.349593	GMC oxidoreductase 7 [Heterobasidion irregulare TC 32-1] &gt;lcl|ETW79511.1 GMC oxidoreductase 7 [Heterobasidion irregulare TC 32-1]
WC01592	845	536	1464	389	837	234	168	172	179	0.347803	predicted protein [Fibroporia radiculosa] &gt;lcl|CCM05132.1 predicted protein [Fibroporia radiculosa]
WC04173	925	610	1090	205	608	114	461	110	304	0.343238	FAD dependent oxidoreductase [Wolfiporia cocos MD-104 SS10]
WC03862	1676	882	2085	471	1005	220	451	434	587	0.341159	6-phosphogluconate dehydrogenase decarboxylating [Trametes versicolor FP-101664 SS1] &gt;lcl|EIW55400.1 6-phosphogluconate dehydrogenase decarboxylating [Trametes versicolor FP-101664 SS1]
WC03782	345	220	376	30	129	63	220	72	126	0.340064	hypothetical protein CERSUDRAFT_116405 [Gelatoporia subvermispora B]
WC03819	712	330	1092	128	106	71	292	376	478	0.339972	predicted protein [Fibroporia radiculosa] &gt;lcl|CCM00866.1 predicted protein [Fibroporia radiculosa]
WC05105	715	494	474	105	196	41	206	208	350	0.32858	predicted protein [Fibroporia radiculosa] &gt;lcl|CCM00124.1 predicted protein [Fibroporia radiculosa]
WC04194	560	378	523	110	146	119	145	166	269	0.326831	tRNA threonylcarbamoyladenosine dehydratase [Grifola frondosa]
WC09120	950	627	844	120	411	117	337	179	403	0.323627	3-hydroxyisobutyrate dehydrogenase [Wolfiporia cocos MD-104 SS10]
WC10792	241	170	287	24	18	17	125	120	147	0.323066	NAD(P)-binding protein [Wolfiporia cocos MD-104 SS10]
WC11660	255	146	304	35	106	32	68	80	132	0.321277	hypothetical protein WOLCODRAFT_140544 [Wolfiporia cocos MD-104 SS10]
WC03336	177	98	147	18	39	18	51	46	99	0.32109	GMC oxidoreductase [Trametes coccinea BRFM310]
WC01776	114	66	129	13	23	9	34	45	63	0.302589	FAD/NAD(P)-binding domain-containing protein [Laetiporus sulphureus 93-53]
WC10729	516	216	578	76	163	130	189	93	138	0.301145	dihydrolipoyl dehydrogenase [Neolentinus lepideus HHB14362 ss-1]
WC08481	1215	1541	1117	442	763	224	210	280	413	0.301059	NAD(P)-binding protein [Wolfiporia cocos MD-104 SS10]
WC11751	0	0	5	2	0	0	0	1	0	0.3	NAD(P)-binding protein [Wolfiporia cocos MD-104 SS10]
WC08265	347	202	308	18	53	57	159	88	135	0.29755	FAD dependent oxidoreductase [Laetiporus sulphureus 93-53]
WC11479	312	206	491	154	113	136	47	49	92	0.292864	NAD(P)-binding protein [Laetiporus sulphureus 93-53]
WC10258	88	69	86	16	20	15	25	8	58	0.292181	NAD(P)-binding protein [Wolfiporia cocos MD-104 SS10]
WC05461	432	297	71	33	93	25	112	80	119	0.28875	GroES-like protein [Wolfiporia cocos MD-104 SS10]
WC01519	51	16	44	19	10	6	8	8	13	0.288288	hypothetical protein DAEQUDRAFT_754869 [Daedalea quercina L-15889]
WC09823	8	7	6	0	0	0	7	0	5	0.285714	hypothetical protein WOLCODRAFT_134507 [Wolfiporia cocos MD-104 SS10]
WC02342	5554	2155	8915	725	2599	959	2279	1007	1569	0.274844	succinate dehydrogenase flavoprotein subunit [Moniliophthora roreri MCA 2997] &gt;lcl|KTB39887.1 hypothetical protein WG66_7588 [Moniliophthora roreri]
WC02983	412	289	448	43	92	63	141	116	176	0.274587	predicted protein [Sparassis crispa] &gt;lcl|GBE89546.1 predicted protein [Sparassis crispa]
WC05133	2329	536	7484	1549	1322	568	1286	422	509	0.273263	NAD(P)-binding protein [Wolfiporia cocos MD-104 SS10]
WC10087	98	61	138	8	4	1	32	65	52	0.272727	NAD(P)-binding protein [Wolfiporia cocos MD-104 SS10]
WC00183	325	169	368	64	52	33	115	96	99	0.266241	FAD/NAD(P)-binding domain-containing protein [Wolfiporia cocos MD-104 SS10]
WC02522	267	162	402	90	80	96	27	60	89	0.265945	NAD(P)-binding protein [Laetiporus sulphureus 93-53]
WC00588	110	71	77	30	19	15	22	18	31	0.261628	FAD/NAD(P)-binding domain-containing protein [Wolfiporia cocos MD-104 SS10]
WC10512	1773	912	2244	151	769	161	809	179	444	0.25492	ferredoxin reductase-like C-terminal NADP-linked domain-containing protein [Wolfiporia cocos MD-104 SS10]
WC11386	0	0	2	0	0	0	0	0	1	0.25	dimethylaniline monooxygenase [Wolfiporia cocos MD-104 SS10]
WC08856	1	0	1	0	0	1	0	0	0	0.25	monooxygenase [Wolfiporia cocos MD-104 SS10]
WC07602	160	81	162	12	11	7	54	55	59	0.245658	NAD(P)-binding protein [Wolfiporia cocos MD-104 SS10]
WC07209	111	98	100	12	19	7	26	42	45	0.244337	FAD/NAD(P)-binding domain-containing protein [Wolfiporia cocos MD-104 SS10]
WC08518	1280	716	1270	200	112	205	229	385	453	0.242498	D-amino-acid oxidase [Sparassis crispa] &gt;lcl|GBE89089.1 D-amino-acid oxidase [Sparassis crispa]
WC08379	6429	5066	4050	422	1941	290	998	1394	2369	0.238469	D-arabinitol dehydrogenase 1 [Sparassis crispa] &gt;lcl|GBE87422.1 D-arabinitol dehydrogenase 1 [Sparassis crispa]
WC11008	441	227	576	51	58	80	145	92	160	0.235531	FAD/NAD(P)-binding domain-containing protein [Wolfiporia cocos MD-104 SS10]
WC00294	8128	3733	11499	222	280	482	2784	3211	3961	0.234161	hypothetical protein SERLADRAFT_470126 [Serpula lacrymans var. lacrymans S7.9] &gt;lcl|EGN98203.1 hypothetical protein SERLA73DRAFT_183120 [Serpula lacrymans var. lacrymans S7.3] &gt;lcl|EGO23780.1 hypothetical protein SERLADRAFT_470126 [Serpula lacrymans var. lacrymans S7.9]
WC10783	24	43	33	9	13	4	8	3	8	0.225	NAD(P)-binding protein [Wolfiporia cocos MD-104 SS10]
WC01492	2174	1553	2787	105	283	170	526	324	1518	0.224593	hypothetical protein TRAPUB_4509 [Trametes pubescens]
WC02124	2004	1250	1915	195	355	255	526	393	530	0.218031	NAD(P)-binding protein [Wolfiporia cocos MD-104 SS10]
WC10660	1920	1243	1743	224	407	288	733	207	249	0.214839	NAD(P)-binding protein [Wolfiporia cocos MD-104 SS10]
WC05681	780	569	688	98	115	201	143	98	215	0.213549	predicted protein [Fibroporia radiculosa] &gt;lcl|CCM04970.1 predicted protein [Fibroporia radiculosa]
WC09245	207	166	115	57	13	6	25	35	72	0.213115	FAD-binding domain-containing protein [Wolfiporia cocos MD-104 SS10]
WC09287	436	207	895	88	81	47	131	114	193	0.212614	NAD(P)-binding protein [Wolfiporia cocos MD-104 SS10]
WC10421	1491	625	2139	280	256	236	432	248	348	0.211516	hypothetical protein PHLGIDRAFT_32236 [Phlebiopsis gigantea 11061_1 CR5-6]
WC08919	246	151	293	22	71	11	68	35	82	0.20942	hypothetical protein WOLCODRAFT_140544 [Wolfiporia cocos MD-104 SS10]
WC08409	324	184	283	45	194	23	39	13	14	0.207332	hypothetical protein WOLCODRAFT_124211 [Wolfiporia cocos MD-104 SS10]
WC09106	800	544	1167	73	155	159	374	81	172	0.201912	hypothetical protein POSPLADRAFT_1038756 [Postia placenta MAD-698-R-SB12] &gt;lcl|OSX64659.1 hypothetical protein POSPLADRAFT_1038756 [Postia placenta MAD-698-R-SB12]
WC07502	0	4	1	0	0	0	1	1	0	0.2	predicted protein [Postia placenta Mad-698-R]
WC07502	0	4	1	0	0	0	1	1	0	0.2	predicted protein [Postia placenta Mad-698-R]
WC05971	5977	4102	5407	2368	959	429	686	616	1077	0.198082	GMC oxidoreductase [Daedalea quercina L-15889]
WC06871	237	157	339	29	34	15	52	59	101	0.197817	NAD(P)-binding protein [Wolfiporia cocos MD-104 SS10]
WC00049	9189	7814	3465	1545	2481	3052	262	217	316	0.192325	hypothetical protein FOMPIDRAFT_1167227 [Fomitopsis pinicola FP-58527 SS1]
WC04859	891	547	1111	41	112	146	261	137	266	0.188898	nucleotide-binding domain-containing protein [Laetiporus sulphureus 93-53]
WC04983	3602	2586	4292	570	402	455	503	633	1349	0.186641	L-aminoadipate-semialdehyde dehydrogenase [Gloeophyllum trabeum ATCC 11539] &gt;lcl|EPQ52011.1 L-aminoadipate-semialdehyde dehydrogenase [Gloeophyllum trabeum ATCC 11539]
WC07923	365	237	493	46	66	54	88	72	77	0.184018	riboflavin synthase domain-like protein [Lentinus tigrinus ALCF2SS1-6]
WC07595	67	25	56	5	16	3	12	11	6	0.179054	NAD(P)-binding protein [Wolfiporia cocos MD-104 SS10]
WC03570	112	131	63	29	59	1	4	2	6	0.165033	FAD/NAD-P-binding domain-containing protein [Laetiporus sulphureus 93-53]
WC04954	2363	1218	2931	334	931	462	277	60	76	0.164312	predicted protein [Fibroporia radiculosa] &gt;lcl|CCL98158.1 predicted protein [Fibroporia radiculosa]
WC08795	1463	232	2758	261	480	241	139	144	152	0.159106	iron uptake cluster protein [Laetiporus sulphureus 93-53]
WC05127	2230	1219	2763	149	721	155	549	103	237	0.154057	ferredoxin reductase-like C-terminal NADP-linked domain-containing protein [Wolfiporia cocos MD-104 SS10]
WC07422	1253	484	1100	88	62	134	395	46	88	0.143285	hypothetical protein FOMPIDRAFT_156775 [Fomitopsis pinicola FP-58527 SS1]
WC08895	1365	630	1905	47	343	34	383	53	86	0.121282	monooxygenase [Wolfiporia cocos MD-104 SS10]
WC11578	90	66	32	0	4	8	12	6	12	0.111702	NAD(P)-binding protein [Wolfiporia cocos MD-104 SS10]
WC01775	590	445	714	86	90	88	27	29	47	0.104917	FAD/NAD-binding domain-containing protein [Fomitiporia mediterranea MF3/22] &gt;lcl|EJC99636.1 FAD/NAD-binding domain-containing protein [Fomitiporia mediterranea MF3/22]
WC01275	15215	8453	23056	1045	3153	1045	2007	1000	1461	0.103919	6-phosphogluconate dehydrogenase [Neolentinus lepideus HHB14362 ss-1]
WC07213	7175	1900	15830	645	87	162	697	967	2507	0.101686	FAD/NAD(P)-binding domain-containing protein [Wolfiporia cocos MD-104 SS10]
WC11078	145	90	33	1	6	3	13	17	14	0.100746	NAD(P)-binding protein [Wolfiporia cocos MD-104 SS10]
WC11138	9	20	7	3	3	0	0	1	0	0.0972222	hypothetical protein WOLCODRAFT_108689 [Wolfiporia cocos MD-104 SS10]
WC00409	3310	1025	5545	200	322	268	442	173	295	0.0860324	NAD(P)-binding protein [Wolfiporia cocos MD-104 SS10]
WC00543	1297	448	1370	72	83	65	112	78	124	0.0857143	NAD(P)-binding protein [Wolfiporia cocos MD-104 SS10]
WC00587	21	12	9	0	2	2	1	0	2	0.0833333	short-chain dehydrogenase/reductase SDR [Wolfiporia cocos MD-104 SS10]
WC07615	21	12	4	0	5	0	0	1	0	0.0810811	NAD(P)-binding protein [Wolfiporia cocos MD-104 SS10]
WC11904	44	20	36	5	2	0	4	2	2	0.075	dimethylaniline monooxygenase [Fomitopsis pinicola FP-58527 SS1]
WC05440	6838	2502	22062	1196	806	681	245	194	417	0.0563499	NAD-dependent formate dehydrogenase [Trametes versicolor FP-101664 SS1] &gt;lcl|EIW63345.1 NAD-dependent formate dehydrogenase [Trametes versicolor FP-101664 SS1]
WC07605	507	101	1155	30	36	19	8	12	17	0.0346001	predicted protein [Fibroporia radiculosa] &gt;lcl|CCM04261.1 predicted protein [Fibroporia radiculosa]
WC02568	8539	6115	39485	181	128	52	309	970	1631	0.0302093	predicted protein [Fibroporia radiculosa] &gt;lcl|CCM04951.1 predicted protein [Fibroporia radiculosa]
WC11753	500	152	1065	16	33	13	16	5	20	0.0299942	predicted protein [Fibroporia radiculosa] &gt;lcl|CCM04261.1 predicted protein [Fibroporia radiculosa]
WC07215	198	92	270	5	6	0	2	8	6	0.0241071	FAD/NAD-P-binding domain-containing protein [Laetiporus sulphureus 93-53]
WC11762	128	88	17	1	0	1	6	1	2	0.0236052	NAD(P)-binding protein [Wolfiporia cocos MD-104 SS10]
WC08860	803	444	363	10	9	8	7	10	21	0.0201863	monooxygenase [Wolfiporia cocos MD-104 SS10]
WC11194	853	399	434	8	4	1	9	11	23	0.0166074	monooxygenase [Wolfiporia cocos MD-104 SS10]
WC07614	189	95	16	1	0	0	0	0	1	0.00333333	NAD(P)-binding protein [Wolfiporia cocos MD-104 SS10]
WC07429	1193	277	2610	5	4	3	8	0	3	0.00281863	GMC oxidoreductase [Wolfiporia cocos MD-104 SS10]
WC10173	2	0	0	0	0	0	0	0	0	0	NAD(P)-binding protein [Wolfiporia cocos MD-104 SS10]
WC10527	1	0	0	0	0	0	0	0	0	0	NAD(P)-binding protein [Wolfiporia cocos MD-104 SS10]
WC00704	0	0	0	0	0	0	1	6	4	#DIV/0!	hypothetical protein WOLCODRAFT_108689 [Wolfiporia cocos MD-104 SS10]
WC10598	0	0	0	0	0	0	0	0	1	#DIV/0!	hypothetical protein WOLCODRAFT_108689 [Wolfiporia cocos MD-104 SS10]
WC09945	0	0	0	1	0	0	1	0	3	#DIV/0!	hypothetical protein WOLCODRAFT_108689 [Wolfiporia cocos MD-104 SS10]
WC04142	0	0	0	0	0	0	0	1	1	#DIV/0!	NADP+-dependent D-mannitol dehydrogenase [Wolfiporia cocos MD-104 SS10]
WC10133	0	0	0	1	1	0	0	0	0	#DIV/0!	NAD(P)-binding protein [Laetiporus sulphureus 93-53]
WC11886	0	0	0	0	1	0	0	0	0	#DIV/0!	NAD(P)-binding protein [Laetiporus sulphureus 93-53]
WC08899	0	0	0	0	2	0	0	0	1	#DIV/0!	monooxygenase [Wolfiporia cocos MD-104 SS10]
