# Supplementary material for: Genomic and Transcriptomic Insight of Giant Sclerotium Formation of Wood-Decay Fungi
Source: Front Microbiol. 2021 Oct 12;12:746121. doi: 10.3389/fmicb.2021.746121 (PMC8546338; doi:10.3389/fmicb.2021.746121)
Supplement: Supplementary file 12 [file Table_12.XLSX]

## Sheet: Sheet1
Supplementary Data 12. Transcriptional regulators in W.cocos genome
Gene ID	Family
WC05992	Zn2C6/Maltose fermentation regulatory protein
WC00333	Zn2C6
WC00028	Zn2C6
WC00251	Zn2C6
WC00338	Zn2C6
WC00291	Zn2C6
WC00085	Zn2C6
WC06130	Zn2C6
WC00574	Zn2C6
WC11720	Zn2C6
WC06287	Zn2C6
WC06586	Zn2C6
WC06601	Zn2C6
WC06281	Zn2C6
WC11723	Zn2C6
WC06796	Zn2C6
WC07560	Zn2C6
WC07740	Zn2C6
WC08752	Zn2C6
WC08744	Zn2C6
WC08618	Zn2C6
WC00852	Zn2C6
WC09027	Zn2C6
WC09164	Zn2C6
WC09139	Zn2C6
WC09532	Zn2C6
WC09167	Zn2C6
WC09379	Zn2C6
WC09927	Zn2C6
WC09882	Zn2C6
WC10021	Zn2C6
WC09642	Zn2C6
WC09673	Zn2C6
WC09889	Zn2C6
WC01854	Zn2C6
WC01791	Zn2C6
WC01843	Zn2C6
WC01653	Zn2C6
WC02126	Zn2C6
WC02167	Zn2C6
WC02225	Zn2C6
WC02508	Zn2C6
WC02481	Zn2C6
WC10402	Zn2C6
WC02664	Zn2C6
WC02701	Zn2C6
WC10561	Zn2C6
WC02911	Zn2C6
WC03273	Zn2C6
WC03506	Zn2C6
WC03442	Zn2C6
WC10904	Zn2C6
WC04149	Zn2C6
WC04016	Zn2C6
WC04130	Zn2C6
WC03918	Zn2C6
WC04145	Zn2C6
WC04129	Zn2C6
WC04111	Zn2C6
WC04503	Zn2C6
WC04421	Zn2C6
WC04277	Zn2C6
WC04597	Zn2C6
WC04974	Zn2C6
WC04645	Zn2C6
WC04731	Zn2C6
WC05275	Zn2C6
WC05303	Zn2C6
WC11358	Zn2C6
WC11334	Zn2C6
WC05412	Zn2C6
WC05606	Zn2C6
WC05418	Zn2C6
WC05347	Zn2C6
WC05515	Zn2C6
WC11557	Zn2C6
WC05979	Zn2C6
WC11613	Zn2C6
WC05984	Zn2C6
WC05924	Zn2C6
WC11695	Zn2C6
WC08511	Zinc_PARP
WC09746	Zinc_GRF
WC05451	Zinc_GRF
WC09257	Zinc finger, CCHC-type/Zinc_GRF
WC06219	Zinc finger, CCHC-type/PHD
WC00369	Zinc finger, CCHC-type
WC00620	Zinc finger, CCHC-type
WC06770	Zinc finger, CCHC-type
WC07890	Zinc finger, CCHC-type
WC07639	Zinc finger, CCHC-type
WC08672	Zinc finger, CCHC-type
WC08671	Zinc finger, CCHC-type
WC08601	Zinc finger, CCHC-type
WC00752	Zinc finger, CCHC-type
WC01122	Zinc finger, CCHC-type
WC09513	Zinc finger, CCHC-type
WC09262	Zinc finger, CCHC-type
WC09195	Zinc finger, CCHC-type
WC09183	Zinc finger, CCHC-type
WC09819	Zinc finger, CCHC-type
WC01747	Zinc finger, CCHC-type
WC01646	Zinc finger, CCHC-type
WC02398	Zinc finger, CCHC-type
WC02483	Zinc finger, CCHC-type
WC10599	Zinc finger, CCHC-type
WC10591	Zinc finger, CCHC-type
WC02950	Zinc finger, CCHC-type
WC10898	Zinc finger, CCHC-type
WC03523	Zinc finger, CCHC-type
WC03384	Zinc finger, CCHC-type
WC11061	Zinc finger, CCHC-type
WC03945	Zinc finger, CCHC-type
WC04082	Zinc finger, CCHC-type
WC04564	Zinc finger, CCHC-type
WC04422	Zinc finger, CCHC-type
WC11207	Zinc finger, CCHC-type
WC11152	Zinc finger, CCHC-type
WC04805	Zinc finger, CCHC-type
WC11500	Zinc finger, CCHC-type
WC05379	Zinc finger, CCHC-type
WC05689	Zinc finger, CCHC-type
WC05487	Zinc finger C2H2-type/Zn2C6
WC05462	Zinc finger C2H2-type/TFII
WC05088	Zinc finger C2H2-type/Regulatory associated protein of TOR
WC07473	Zinc finger C2H2-type/PHD/Zn2C6
WC06169	Zinc finger C2H2-type/PHD
WC07057	Zinc finger C2H2-type/PHD
WC07797	Zinc finger C2H2-type/PHD
WC08222	Zinc finger C2H2-type/PHD
WC08509	Zinc finger C2H2-type/PHD
WC08540	Zinc finger C2H2-type/PHD
WC01344	Zinc finger C2H2-type/PHD
WC09597	Zinc finger C2H2-type/PHD
WC10008	Zinc finger C2H2-type/PHD
WC01743	Zinc finger C2H2-type/PHD
WC10153	Zinc finger C2H2-type/PHD
WC03672	Zinc finger C2H2-type/PHD
WC04721	Zinc finger C2H2-type/PHD
WC05067	Zinc finger C2H2-type/PHD
WC05308	Zinc finger C2H2-type/PHD
WC05893	Zinc finger C2H2-type/PHD
WC01141	Zinc finger C2H2-type/homeodomain/Myb domain
WC00081	Zinc finger C2H2-type
WC00012	Zinc finger C2H2-type
WC00136	Zinc finger C2H2-type
WC06113	Zinc finger C2H2-type
WC00628	Zinc finger C2H2-type
WC06576	Zinc finger C2H2-type
WC06695	Zinc finger C2H2-type
WC06836	Zinc finger C2H2-type
WC06997	Zinc finger C2H2-type
WC06617	Zinc finger C2H2-type
WC06995	Zinc finger C2H2-type
WC07298	Zinc finger C2H2-type
WC07299	Zinc finger C2H2-type
WC07194	Zinc finger C2H2-type
WC07347	Zinc finger C2H2-type
WC07019	Zinc finger C2H2-type
WC07126	Zinc finger C2H2-type
WC07714	Zinc finger C2H2-type
WC08212	Zinc finger C2H2-type
WC08055	Zinc finger C2H2-type
WC08062	Zinc finger C2H2-type
WC08627	Zinc finger C2H2-type
WC08623	Zinc finger C2H2-type
WC08633	Zinc finger C2H2-type
WC01041	Zinc finger C2H2-type
WC01253	Zinc finger C2H2-type
WC01171	Zinc finger C2H2-type
WC09032	Zinc finger C2H2-type
WC09211	Zinc finger C2H2-type
WC09505	Zinc finger C2H2-type
WC09406	Zinc finger C2H2-type
WC09747	Zinc finger C2H2-type
WC09679	Zinc finger C2H2-type
WC01805	Zinc finger C2H2-type
WC10066	Zinc finger C2H2-type
WC10053	Zinc finger C2H2-type
WC01594	Zinc finger C2H2-type
WC01874	Zinc finger C2H2-type
WC01940	Zinc finger C2H2-type
WC10302	Zinc finger C2H2-type
WC10355	Zinc finger C2H2-type
WC10350	Zinc finger C2H2-type
WC02551	Zinc finger C2H2-type
WC10630	Zinc finger C2H2-type
WC02553	Zinc finger C2H2-type
WC02792	Zinc finger C2H2-type
WC03163	Zinc finger C2H2-type
WC02985	Zinc finger C2H2-type
WC03137	Zinc finger C2H2-type
WC03245	Zinc finger C2H2-type
WC03248	Zinc finger C2H2-type
WC02851	Zinc finger C2H2-type
WC10703	Zinc finger C2H2-type
WC10730	Zinc finger C2H2-type
WC11018	Zinc finger C2H2-type
WC11171	Zinc finger C2H2-type
WC11277	Zinc finger C2H2-type
WC04565	Zinc finger C2H2-type
WC11244	Zinc finger C2H2-type
WC04567	Zinc finger C2H2-type
WC05314	Zinc finger C2H2-type
WC05280	Zinc finger C2H2-type
WC11300	Zinc finger C2H2-type
WC05066	Zinc finger C2H2-type
WC05496	Zinc finger C2H2-type
WC11565	Zinc finger C2H2-type
WC05373	Zinc finger C2H2-type
WC05870	Zinc finger C2H2-type
WC06821	YL1
WC01009	YL1
WC07129	Wings apart-like protein regulation of heterochromatin
WC00583	Velvet superfamily
WC00778	Velvet superfamily
WC04100	Velvet superfamily
WC04103	Velvet superfamily
WC06257	Velvet superfamily
WC11608	Velvet superfamily
WC02291	Velvet
WC04104	Velvet
WC04105	Velvet
WC07291	Velvet
WC09593	Velvet
WC11380	Velvet
WC11609	Velvet
WC03398	Up-regulated during septation protein 1
WC03849	TUP2
WC08521	TUP1
WC05312	Transcription-silencing protein, cryptic loci regulator Clr2
WC06215	Transcription-silencing protein, cryptic loci regulator Clr2
WC02276	Transcriptional regulator TACO1-like
WC01150	TFIII/HTH/AT hook
WC04656	TFIII/homeodomain/Myb domain
WC10344	TFIII
WC09158	TFII/HTH/HTH
WC03454	TFII/HTH/HTH
WC03408	TFII/cyclin
WC05186	TFII/cyclin
WC02938	TFII/Bromodomain
WC06123	TFII
WC08067	TFII
WC08730	TFII
WC01004	TFII
WC01528	TFII
WC09295	TFII
WC09467	TFII
WC04364	TFII
WC04719	TFII
WC05300	TFII
WC05455	TFII
WC05646	TFII
WC02285	Telomere length regulation protein
WC08118	TEA
WC02141	TEA
WC02310	T-cell immunomodulatory protein
WC07696	Store-operated calcium entry-associated regulatory factor
WC03401	Store-operated calcium entry regulator STIMATE/YPL162C
WC03397	Store-operated calcium entry regulator STIMATE/YPL162C
WC00116	STE
WC07958	STE
WC07979	STE
WC10813	STE
WC06039	STE
WC05477	ssDNA-binding transcriptional regulator
WC02647	SPT4
WC02881	SPT4
WC11373	Signal transduction response regulator, receiver domain
WC05683	Signal transduction response regulator, receiver domain
WC05040	Signal transduction response regulator, receiver domain
WC03152	Signal transduction response regulator, receiver domain
WC02986	Signal transduction response regulator, receiver domain
WC10428	Signal transduction response regulator, receiver domain
WC01078	Signal transduction response regulator, receiver domain
WC06476	Signal transduction response regulator, receiver domain
WC00577	Signal transduction response regulator, receiver domain
WC02987	Signal transduction response regulator, receiver domain
WC06200	SET domain/PHD
WC00186	SET domain
WC06614	SET domain
WC07420	SET domain
WC07142	SET domain
WC08585	SET domain
WC01047	SET domain
WC01184	SET domain
WC09566	SET domain
WC02123	SET domain
WC02817	SET domain
WC02555	SET domain
WC03548	SET domain
WC04240	SET domain
WC05154	SET domain
WC05390	SET domain
WC07523	SART1
WC03407	Ribosomal biogenesis regulatory protein
WC11560	Regulator of chromosome condensation, RCC1
WC05042	Regulator of chromosome condensation, RCC1
WC03105	Regulator of chromosome condensation, RCC1
WC02492	Regulator of chromosome condensation, RCC1
WC11707	Regulator of chromosome condensation, RCC1
WC10205	Regulator of chromosome condensation, RCC1
WC09675	Regulator of chromosome condensation, RCC1
WC09676	Regulator of chromosome condensation, RCC1
WC11561	Regulator of chromosome condensation 1/beta-lactamase-inhibitor protein II
WC08136	Regulator of chromosome condensation 1/beta-lactamase-inhibitor protein II
WC00886	Poly(ADP-ribose) polymerase, regulatory domain
WC03019	PI31 proteasome regulator
WC10753	PHD/Zinc_PARP
WC11082	PHD/Zinc_PARP
WC00328	PHD/Zinc_MIZ
WC01509	PHD/Zinc_MIZ
WC04343	PHD/Zinc_MIZ
WC09669	PHD/Regulator of chromosome condensation 1/beta-lactamase-inhibitor protein II
WC01033	PHD/HTH
WC03352	PHD/GATA
WC03395	PHD/ARID
WC00087	PHD
WC00268	PHD
WC00324	PHD
WC00070	PHD
WC00337	PHD
WC06234	PHD
WC00553	PHD
WC06151	PHD
WC06347	PHD
WC11811	PHD
WC06571	PHD
WC06346	PHD
WC06960	PHD
WC11874	PHD
WC06730	PHD
WC06618	PHD
WC11871	PHD
WC07258	PHD
WC07033	PHD
WC07132	PHD
WC07026	PHD
WC07431	PHD
WC07833	PHD
WC07636	PHD
WC07919	PHD
WC07916	PHD
WC08384	PHD
WC07968	PHD
WC08644	PHD
WC08477	PHD
WC00850	PHD
WC00759	PHD
WC00814	PHD
WC00984	PHD
WC01242	PHD
WC01016	PHD
WC00986	PHD
WC01197	PHD
WC01132	PHD
WC01104	PHD
WC01146	PHD
WC00993	PHD
WC01392	PHD
WC09059	PHD
WC01334	PHD
WC09010	PHD
WC01545	PHD
WC09145	PHD
WC09090	PHD
WC09340	PHD
WC09411	PHD
WC09537	PHD
WC09223	PHD
WC09758	PHD
WC10015	PHD
WC09757	PHD
WC09731	PHD
WC10049	PHD
WC10044	PHD
WC10082	PHD
WC10045	PHD
WC01681	PHD
WC01576	PHD
WC01591	PHD
WC02205	PHD
WC02354	PHD
WC02004	PHD
WC02162	PHD
WC02213	PHD
WC10168	PHD
WC10165	PHD
WC02782	PHD
WC02748	PHD
WC02680	PHD
WC02808	PHD
WC03021	PHD
WC03066	PHD
WC03083	PHD
WC10852	PHD
WC10687	PHD
WC10851	PHD
WC03705	PHD
WC03706	PHD
WC10935	PHD
WC03981	PHD
WC04056	PHD
WC04138	PHD
WC11146	PHD
WC04493	PHD
WC04381	PHD
WC04505	PHD
WC04582	PHD
WC04697	PHD
WC04733	PHD
WC04920	PHD
WC04866	PHD
WC04793	PHD
WC04580	PHD
WC05285	PHD
WC05321	PHD
WC05173	PHD
WC05494	PHD
WC05467	PHD
WC05693	PHD
WC05568	PHD
WC05506	PHD
WC11644	PHD
WC04511	P53
WC05449	P53
WC01518	Nusa
WC04353	Nusa
WC04657	Nusa
WC00690	Nitrogen regulatory protein PII/ATP phosphoribosyltransferase, C-terminal
WC08873	Nitrogen regulatory protein PII/ATP phosphoribosyltransferase, C-terminal
WC05663	Nitrogen Permease regulator of amino acid transport activity 3
WC01913	Nitrogen permease regulator 2
WC01958	NAC
WC10873	NAC
WC03686	NAC
WC02278	Meiosis regulator and mRNA stability factor 1
WC00576	Meiosis regulator and mRNA stability factor 1
WC00575	Meiosis regulator and mRNA stability factor 1
WC02273	Meiosis regulator and mRNA stability factor 1
WC06084	Meiosis regulator and mRNA stability factor 1
WC00235	MADS
WC09658	MADS
WC04331	MADS
WC08594	Ion channel regulatory protein, UNC-93
WC10540	Ion channel regulatory protein, UNC-93
WC10543	Ion channel regulatory protein, UNC-93
WC10542	Ion channel regulatory protein, UNC-93
WC01574	HTH/Signal transduction response regulator, receiver domain
WC11144	HTH/Signal transduction response regulator, receiver domain
WC07316	HTH/HTH
WC07065	HTH/HTH
WC06239	HTH
WC11724	HTH
WC06716	HTH
WC07776	HTH
WC07694	HTH
WC09162	HTH
WC01919	HTH
WC02510	HTH
WC03123	HTH
WC10698	HTH
WC05837	HTH
WC11652	HTH
WC00353	HTH
WC00220	HTH
WC00262	HTH
WC00426	HTH
WC00500	HTH
WC00487	HTH
WC00495	HTH
WC06095	HTH
WC06080	HTH
WC06462	HTH
WC06522	HTH
WC06930	HTH
WC07084	HTH
WC07465	HTH
WC07571	HTH
WC07806	HTH
WC07641	HTH
WC07961	HTH
WC07980	HTH
WC08103	HTH
WC08578	HTH
WC08570	HTH
WC01020	HTH
WC01540	HTH
WC01467	HTH
WC08898	HTH
WC01371	HTH
WC09136	HTH
WC09080	HTH
WC09305	HTH
WC09159	HTH
WC09278	HTH
WC09633	HTH
WC09618	HTH
WC01566	HTH
WC01895	HTH
WC01567	HTH
WC01556	HTH
WC01641	HTH
WC01831	HTH
WC01893	HTH
WC02383	HTH
WC10397	HTH
WC10251	HTH
WC10442	HTH
WC10381	HTH
WC02695	HTH
WC02731	HTH
WC02947	HTH
WC03094	HTH
WC02888	HTH
WC03149	HTH
WC03289	HTH
WC03148	HTH
WC03158	HTH
WC03159	HTH
WC03023	HTH
WC03157	HTH
WC03012	HTH
WC10857	HTH
WC03411	HTH
WC10828	HTH
WC10802	HTH
WC03700	HTH
WC03569	HTH
WC03587	HTH
WC04011	HTH
WC11043	HTH
WC04025	HTH
WC11124	HTH
WC11133	HTH
WC03951	HTH
WC11134	HTH
WC04455	HTH
WC11264	HTH
WC04376	HTH
WC04557	HTH
WC11158	HTH
WC04885	HTH
WC04797	HTH
WC04825	HTH
WC05090	HTH
WC11504	HTH
WC05383	HTH
WC05354	HTH
WC05352	HTH
WC05441	HTH
WC05828	HTH
WC05805	HTH
WC11684	HTH
WC06004	HTH
WC06027	HTH
WC06041	HTH
WC01541	HORMA
WC01808	HORMA
WC04377	HORMA
WC04644	HORMA
WC06610	homeodomain/Myb domain
WC07960	homeodomain/Myb domain
WC08337	homeodomain/Myb domain
WC01351	homeodomain/Myb domain
WC09026	homeodomain/Myb domain
WC02072	homeodomain/Myb domain
WC02409	homeodomain/Myb domain
WC02939	homeodomain/Myb domain
WC03316	homeodomain/Myb domain
WC03382	homeodomain/Myb domain
WC03509	homeodomain/Myb domain
WC10978	homeodomain/Myb domain
WC04181	homeodomain/Myb domain
WC05027	homeodomain/Myb domain
WC03644	homeodomain/HTH/Myb domain
WC00247	homeodomain/HTH
WC10699	homeodomain/HTH
WC10736	homeodomain/HTH
WC10734	homeodomain/HTH
WC00564	homeodomain
WC07721	homeodomain
WC08800	homeodomain
WC02413	homeodomain
WC04600	homeodomain
WC04749	homeodomain
WC04628	homeodomain
WC04599	homeodomain
WC05316	homeodomain
WC05087	homeodomain
WC05257	homeodomain
WC02008	HMG/AT hook
WC07329	HLH
WC07589	HLH
WC08543	HLH
WC08516	HLH
WC01609	HLH
WC03099	HLH
WC10775	HLH
WC03630	HLH
WC04012	HLH
WC04730	HLH
WC04810	HLH
WC04808	HLH
WC07305	Golgi pH regulator, conserved domain
WC00129	GC-rich
WC06454	GC-rich
WC06959	GCN5
WC10688	GCN5
WC04390	GCN5
WC11808	GATA
WC06336	GATA
WC06383	GATA
WC07307	GATA
WC01658	GATA
WC10493	GATA
WC03984	GATA
WC11252	GATA
WC05212	GATA
WC05937	GATA
WC05751	GATA
WC08357	Down-regulated-in-metastasis protein
WC10644	Down-regulated-in-metastasis protein
WC10957	Down-regulated-in-metastasis protein
WC01985	Dolichol phosphate-mannose biosynthesis regulatory
WC10038	DNA replication regulator Sld3
WC01370	DDT
WC00462	cyclin
WC06981	cyclin
WC01028	cyclin
WC01367	cyclin
WC01342	cyclin
WC01887	cyclin
WC01559	cyclin
WC02153	cyclin
WC02384	cyclin
WC02173	cyclin
WC02739	cyclin
WC02726	cyclin
WC02732	cyclin
WC02625	cyclin
WC03165	cyclin
WC03675	cyclin
WC11126	cyclin
WC03954	cyclin
WC05640	cyclin
WC05499	cyclin
WC05737	cyclin
WC00065	copper
WC07846	copper
WC08445	copper
WC08778	copper
WC08537	copper
WC00900	copper
WC01245	copper
WC09143	copper
WC09218	copper
WC09646	copper
WC09981	copper
WC09726	copper
WC09647	copper
WC09867	copper
WC09980	copper
WC09961	copper
WC09910	copper
WC10174	copper
WC02764	copper
WC02616	copper
WC10528	copper
WC10930	copper
WC03902	copper
WC04062	copper
WC04911	copper
WC11698	copper
WC08664	CCAAT
WC02142	CCAAT
WC03860	CCAAT
WC00362	CBF
WC00395	CBF
WC11846	CBF
WC08748	CBF
WC08693	CBF
WC08589	CBF
WC10535	CBF
WC02533	CBF
WC11491	CBF
WC00095	bZIP
WC06271	bZIP
WC06619	bZIP
WC08142	bZIP
WC08139	bZIP
WC08562	bZIP
WC01118	bZIP
WC01030	bZIP
WC01432	bZIP
WC09222	bZIP
WC09300	bZIP
WC02883	bZIP
WC04040	bZIP
WC04485	bZIP
WC05437	bZIP
WC06510	Bromodomain/PHD
WC04069	Bromodomain/PHD
WC06477	Bromodomain/homeodomain/PHD/GATA
WC07461	Bromodomain
WC08251	Bromodomain
WC08081	Bromodomain
WC08803	Bromodomain
WC01252	Bromodomain
WC00980	Bromodomain
WC01042	Bromodomain
WC01899	Bromodomain
WC02572	Bromodomain
WC03284	Bromodomain
WC04099	Bromodomain
WC04799	Bromodomain
WC04908	Bromodomain
WC05442	Bromodomain
WC00443	ATP synthase regulation protein NCA2
WC07742	ARID
WC07755	ARID
WC09052	ARID
WC01349	ARID
WC08924	AraC-type transcription regulator, ligand-binding domain
WC11665	AraC-type transcription regulator, ligand-binding domain
WC02715	Aft1
